1 **Active avoidance requires inhibitory signaling in the rodent prelimbic prefrontal cortex.**

2

3 **Authors & Affiliations:**

4 Maria M. Diehl<sup>1</sup>, Christian Bravo-Rivera<sup>1,2</sup>, Jose Rodríguez-Romaguera<sup>3</sup>, Pablo A. Pagán-  
5 Rivera<sup>1</sup>, Anthony Burgos-Robles<sup>4</sup>, Gregory J. Quirk<sup>1,2</sup>

6 <sup>1</sup>Department of Psychiatry, University of Puerto Rico School of Medicine, San Juan, PR 00936

7 <sup>2</sup>Department of Neurobiology & Anatomy, University of Puerto Rico School of Medicine, San  
8 Juan, PR 00936

9 <sup>3</sup>Department of Psychiatry and Neuroscience Center, University of North Carolina at Chapel Hill,  
10 Chapel Hill, NC 27599

11 <sup>4</sup>Department of Brain and Cognitive Sciences, Massachusetts Institute of Technology,  
12 Cambridge, MA 02139

13 **Running Title:** Avoidance depends on prelimbic inhibitory responses.

14 **Corresponding Author:**

15 Maria M. Diehl

16 Department of Psychiatry and Neurobiology & Anatomy

17 University of Puerto Rico School of Medicine

18 San Juan, PR 00936

19 Tel: 787-999-3057

20 Email: [maria.m.diehl@gmail.com](mailto:maria.m.diehl@gmail.com)

21 **Number of words in Abstract:** 150

22 **Number of words in Intro, Results, Discussion:** 4,067

23 **Keywords:** Fear, single unit recordings, optogenetics, channelrhodopsin, archaerhodopsin.

24 **Acknowledgements:** This study was supported by NIH grants F32-MH105185 to MMD, R36-

25 MH102968 to CBR, R36-MH105039 to JRR, R25-NS080687 to PAPR, R37-MH058883 and

26 P50-MH106435 to GJQ, and the University of Puerto Rico President's Office. We thank Drs.

27 Denis Pare and Drew Headley for comments on an earlier version. We also thank Jorge  
28 Maldonado de Jesus, Valeria Lozada-Miranda, Joyce Mendoza-Navarro, Jorge Iravedra-Garcia,  
29 and Fabiola Gonzalez-Díaz for help with behavioral experiments and Carlos Rodríguez and  
30 Zarkalys Quintero for technical assistance.

31 **Competing interests:** The authors declare that no competing interests exist.

32 **Abstract**

33           Much is known about the neural circuits of conditioned fear and its relevance to  
34 understanding anxiety disorders, but less is known about other anxiety-related behaviors such  
35 as active avoidance. Using a tone-signaled, platform-mediated active avoidance task, we  
36 observed that pharmacological inactivation of the prelimbic prefrontal cortex (PL) delayed  
37 initiation of avoidance. However, optogenetic silencing of PL neurons did not delay avoidance.  
38 Consistent with this finding, inhibitory, but not excitatory, responses of rostral PL neurons to the  
39 tone were correlated with initiation of avoidance. To oppose inhibitory responses, we  
40 photoactivated rostral PL neurons during the tone to maintain pre-tone firing rate.  
41 Photoactivation of rostral PL (but not caudal PL) neurons at 4 Hz (but not 2 Hz) delayed or  
42 prevented avoidance. These findings suggest that the initiation of active avoidance requires  
43 inhibitory neuronal responses in rostral PL, and underscores the importance of designing  
44 behavioral optogenetic studies based on neuronal firing patterns.

## 45 **Introduction**

46           Core symptoms of post-traumatic stress disorder and other anxiety disorders include  
47 excessive fear and maladaptive avoidance (DSM–V, 2013). The neural mechanisms of  
48 excessive fear have been well-characterized in rodents using Pavlovian fear conditioning  
49 (Johansen et al., 2011, Herry and Johansen, 2014, Giustino and Maren, 2015, Do Monte et al.,  
50 2016), yet the neural underpinnings of active avoidance are just beginning to emerge. Previous  
51 work in rats has shown that the prefrontal cortex, amygdala, and striatum are all necessary for  
52 the expression of active avoidance (Martinez et al., 2013, Moscarello and LeDoux, 2013, Beck  
53 et al., 2014, Jiao et al., 2015, LeDoux et al., 2017). Using a tone-signaled, platform-mediated  
54 avoidance task, we previously observed that pharmacological inactivation of the prelimbic  
55 prefrontal cortex (PL) impaired the expression of avoidance without affecting freezing (Bravo-  
56 Rivera et al., 2014). Furthermore, avoidance that persisted following extinction training was  
57 correlated with excessive PL activity, as indicated by the immediate early gene cFos (Bravo-  
58 Rivera et al., 2015), suggesting that PL activity drives active avoidance.

59           Important questions remain, however, regarding the role of PL in avoidance. First, how  
60 do PL neurons signal avoidance? Fear conditioning mainly induces excitatory responses to  
61 conditioned tones in PL that correlate with freezing (Baeg et al., 2001, Burgos-Robles et al.,  
62 2009, Sotres-Bayon et al., 2012, Isogawa et al., 2013, Pendyam et al., 2013, Chang et al.,  
63 2010), but firing properties of PL neurons during active avoidance have not been previously  
64 studied. In platform-mediated avoidance, PL signaling of avoidance may differ from PL signaling  
65 of freezing or foraging for food (Burgos-Robles et al., 2013), both of which can interfere with  
66 platform avoidance. Second, is PL activity correlated with the initial decision to avoid and/or the  
67 subsequent expression of avoidance?

68           We addressed these questions with single unit recordings to determine PL signaling  
69 during discrete events leading to the successful execution of active avoidance. We then  
70 optogenetically silenced or activated PL neurons, based on the observed firing properties. We

71 find that inhibitory responses (rather than excitatory responses) of rostral PL neurons at tone  
72 onset are correlated with the initiation of active avoidance. Reducing these inhibitory neuronal  
73 responses with photoactivation delayed or prevented the initiation of avoidance, suggesting that  
74 prefrontal inhibition underlies the decision to avoid danger.

75

## 76 **Results**

### 77 **Pharmacological inactivation of PL delays the initiation of avoidance.**

78 We first replicated prior findings that pharmacological inactivation of PL with muscimol  
79 (MUS) impairs avoidance in this task (Bravo-Rivera et al., 2014), with two modifications: 1) we  
80 used fluorescently labeled MUS to assess spread to adjacent regions, and 2) we analyzed the  
81 time course of avoidance behavior across the 30 sec tone cue. Because the 2 sec shock co-  
82 terminates with the tone, the rat has 28 sec to stop pressing the lever for food and step onto the  
83 platform to escape the shock. Furthermore, in this task, avoidance comes at a cost, as it  
84 competes with access to food. Thus, the involvement of PL could vary with changes in the cost  
85 and/or urgency of avoidance as the tone progresses (Zeeb et al., 2015, Hosking et al., 2016).

86 Histological analysis showed that MUS was confined to PL in its mid rostral-caudal  
87 extent (Figure 1A). Rats showing substantial spread to adjacent infralimbic cortex were  
88 excluded (n=3). In some cases, MUS reached the ventral half of cingulate cortex (Cg1), but they  
89 were included due to similar functions of Cg1 and PL (Courtin et al., 2014). Following surgical  
90 implantation of cannulas, rats were trained in platform-mediated avoidance over 10 days as  
91 previously described (Figure 1B, Bravo-Rivera et al., 2014, Rodriguez-Romaguera et al., 2016).  
92 At Test 1 (Day 11), we infused MUS into PL at the same concentration as our prior studies  
93 using fluorescent MUS (Do-Monte et al., 2015b, Rodriguez-Romaguera et al., 2016) and waited  
94 45 minutes before commencing a 2-tone test of avoidance expression (without shock). Figure  
95 1C shows that MUS inactivation significantly reduced the time spent on the platform during the  
96 tone, as compared to saline (SAL) infused controls (SAL 92% vs. MUS 57%, unpaired t-test,

97  $t_{(28)}=-4.019$ ,  $p<0.01$ , Bonferroni corrected). An analysis of avoidance across the tone in 3 sec  
98 bins (Figure 1D) indicated that 11/13 MUS-infused rats were significantly delayed in their  
99 initiation of avoidance (repeated measures ANOVA,  $F_{(1,9)}=4.076$ ,  $p<0.001$ ; post hoc Tukey test,  
100 0-15 sec  $**p<0.01$ , 15-21 sec  $*p<0.05$ ), and 2/13 rats never avoided (Mann Whitney U Test,  
101  $p<0.001$ , Figure 1E). MUS also increased freezing during the tone (Figure 1E inset; SAL = 36%  
102 vs. MUS = 55% freezing, unpaired t-test,  $t_{(28)}=2.460$ ,  $p=0.020$ ). MUS inactivation of PL had no  
103 effect on locomotion, as indicated by distance traveled in an open field test during a 5 min  
104 period (SAL  $n=10$ , 13.23 m vs. MUS  $n=10$ , 12.53 m, unpaired t-test,  $p=0.614$ ). Nor did it affect  
105 anxiety levels, as both groups spent a similar amount of time in the center of the open field (SAL  
106 = 15.69 sec vs. MUS = 18.76 sec, unpaired t-test,  $p=0.363$ ). Thus, in the majority of rats,  
107 pharmacological inactivation of PL slowed the initiation of avoidance during the tone.

108

### 109 **Photosilencing of PL neurons does not delay avoidance.**

110 Because pharmacological inactivation of PL delayed avoidance initiation, we reasoned  
111 that tone-induced activity in PL would be essential for early avoidance. To assess this, we used  
112 an optogenetic approach, expressing the microbial opsin archaerhodopsin (Arch) in PL, which  
113 causes a hydrogen proton efflux to hyperpolarize neurons when exposed to 532 nm (green)  
114 light (Chow et al., 2010, Han et al., 2011). We delivered Arch by infusing an adeno-associated  
115 virus (AAV) encoding both Arch and enhanced yellow fluorescent protein (eYFP) under the  
116 control of the CAMKII- $\alpha$  promoter to target glutamatergic projection neurons  
117 (AAV5:CaMKII $\alpha$ ::eArchT3.0-eYFP; Liu and Jones, 1996). We first confirmed that Arch silences  
118 PL neurons in anesthetized rats by recording extracellular activity in PL while illuminating Arch-  
119 expressing PL neurons (Figure 2A). Laser illumination significantly decreased the firing rate of  
120 41/70 neurons, and increased the firing rate of 11/70 neurons (Figure 2A, paired t-tests  
121 comparing pre-laser vs laser activity of each unit using 1-sec time bins, all  $p$ 's $<0.05$ ).

122           Next, we infused Arch into PL, distinguishing between rostral PL (rPL; defined as dorsal  
123 to medial orbitofrontal cortex and anterior to the infralimbic cortex) and caudal PL (cPL; defined  
124 as dorsal to the infralimbic cortex; Figure 2B) based on distinct connectivity of these sub-regions  
125 (Floyd et al., 2000, Floyd et al., 2001). Ten days of avoidance training commenced 6-8 weeks  
126 after viral infusion. Rats were then tested for avoidance expression. PL neurons were  
127 illuminated with laser during the first tone, followed by a second tone with the laser off.  
128 Surprisingly, avoidance initiation was not impaired by photosilencing of either rPL (Figure 2C) or  
129 cPL (Figure 2D&F). Further examination showed that photosilencing rPL neurons had no  
130 significant effect on the time course of avoidance following tone onset (Figure 2E left). However,  
131 rPL-Arch rats avoided significantly earlier compared to rPL-eYFP control rats, as measured by  
132 avoidance latency (Figure 2E right, Mann Whitney U test,  $p=0.0202$ ).

133           The lack of impairment of avoidance may suggest that we failed to sufficiently inhibit PL  
134 activity via Arch photosilencing. Arguing against this, however, photosilencing rPL neurons  
135 during early avoidance training (on day 2) significantly reduced tone-induced freezing (eYFP-  
136 control,  $n=9$ , 31% vs. eYFP-Arch  $n=8$ , 7% freezing, unpaired t-test,  $t_{(15)}=0.288$ ,  $p=0.0115$ ). Thus,  
137 contrary to our initial hypothesis, excitatory activity of PL projection neurons does not appear to  
138 be necessary for initiation of avoidance. Instead, silencing rPL tended to facilitate avoidance (as  
139 indicated by the decrease in latency), raising the possibility that avoidance signaling may  
140 involve rPL inhibition rather than excitation.

141

### 142 **Inhibitory responses in rostral PL neurons correlate with the initiation of avoidance.**

143           An assumption of our photosilencing approach was that increased activity in PL neurons  
144 is correlated with avoidance, however, this hypothesis had never been tested. We therefore  
145 performed extracellular single unit recordings in PL of well-trained rats during avoidance  
146 expression. Units were recorded from the full rostral-caudal extent of PL (Figure 3A). We first  
147 characterized PL activity at tone onset (Figure 3B-D). Both excitatory and inhibitory responses

148 were observed at tone onset (Figure 2B right). Figure 3C shows the proportions of neurons that  
149 were significantly responsive (at each 500 ms bin) throughout the tone. Out of a total of 241  
150 neurons, 34 were excited (14%,  $Z > 2.58$  ( $p < 0.01$ ) in the first 500 ms) and 25 were inhibited  
151 (10%,  $Z < -1.96$  ( $p < 0.05$ ) in the first or second 500 ms bin) at tone onset, relative to 10 sec of  
152 pre-tone activity (Figure 3D left). This brief post-tone latency ( $< 1$  sec) was selected to ensure  
153 that the activity of PL neurons was limited to the tone, and not subsequent behavior, such as  
154 platform entry, which typically occurred  $\sim 5$  sec after tone onset (see black dots above graph in  
155 Figure 3C).

156 To determine if these tone responses were correlated with avoidance, rather than  
157 sensory perception of the tone, we compared PL responses in this group of rats with those of a  
158 naïve control group trained to press for food and presented with tones in the same chamber with  
159 the platform. Naïve rats were free to mount the platform and explore the chamber, but were  
160 never shocked. To determine whether activity at tone onset might represent the aversiveness of  
161 the tone, we also compared responses in avoidance rats with responses in rats subjected to  
162 auditory fear conditioning in the same chamber (re-analysis of data from Burgos-Robles et al.,  
163 2009). Surprisingly, there were no significant differences in the percentage of neurons showing  
164 excitatory tone responses in the avoidance group compared to the naïve or fear groups (Figure  
165 3D right; avoidance-trained: 34/241 (14%), naïve: 20/166 (12%), fear: 25/191 (13%), Chi Square  
166 = 0.242,  $p = 0.886$ ). Inhibitory responses, however, occurred more frequently in avoidance-  
167 trained rats compared to naïve or fear rats (avoidance-trained: 25/241 (10%), naïve: 3/166 (2%),  
168 fear: 3/191 (2%), Chi Square = 22.649,  $p < 0.001$ ).

169 We then compared tone responses in avoidance and naïve rats at multiple time points  
170 around the tone onset. Consistent with the data shown in the pie charts of the avoidance and  
171 naïve groups, the percentage of excited cells did not significantly differ between avoidance  
172 (gold) and naïve (light yellow) rats at tone onset (time = 0 sec, Figure 3D bottom). The  
173 percentage of inhibited cells, however, was significantly higher in avoidance rats compared to



174 naïve rats during the first two 500 ms bins (Fisher Exact tests, both  $p$ 's<0.01). Group differences  
175 observed after tone onset for both excitatory and inhibitory responses likely reflect the  
176 expression of avoidance behavior, which occurred in the avoidance group but not the naïve  
177 group.

178         We next examined PL activity at platform entry, defined as the moment at which the rat's  
179 head entered the platform zone (Figure 3E-G). Activity around platform entry was compared to  
180 the same pre-tone baseline used in assessing responses to tone onset. Both excitatory and  
181 inhibitory responses to platform entry were observed (Figure 3E right). Figure 3F shows the  
182 proportion of neurons that were responsive at each 500 ms time bin around platform entry. PL  
183 neurons were either excited ( $n=40/218$ ; 18%;  $Z > 2.58$  in the first 500 ms) or inhibited ( $22/218$ ;  
184 10%;  $Z < -1.96$  in the first or second 500 ms bin) at platform entry (Figure 3G left). The  
185 proportions showing each response in avoidance-trained rats did not differ significantly from  
186 those in naïve controls (Figure 3G right;  $n=23/160$ ; 15% excited;  $n=10/160$ ; 6% inhibited, Fisher  
187 Exact Tests, excited  $p=0.331$ ; inhibited  $p=0.197$ ), suggesting that platform entry responses in  
188 PL represent sensory perception and/or motor responses rather than avoidance of threat (Amir  
189 et al., 2015). Only inhibitory responses at tone onset correlated with initiation of avoidance of  
190 threat.

191         We then compared platform entry responses in avoidance and naïve rats at multiple time  
192 points around platform entry. Similar to tone responses, the percentage of excited cells did not  
193 significantly differ between avoidance (gold) and naïve (light yellow) rats at platform entry (time  
194 = 0 sec, Figure 3G bottom). Nor did the percentage of inhibited cells significantly differ at most  
195 time points (Fisher exact test), suggesting that activity changes at platform entry do not reflect  
196 avoidance of threat. Group differences observed after platform entry likely reflect sustained tone  
197 responses in avoidance rats, which were not present in naïve rats, as they mounted the platform  
198 outside of the tone.

199 In order to determine whether platform entry responses were distinct from tone  
200 responses, we examined activity during platform entry only in the neurons that showed tone  
201 responses (Figure 3H). Of the 34 cells that were excited at tone onset, only 7 (20%) were also  
202 excited at platform entry. Similarly, of the 25 cells that were inhibited at tone onset, only 9 (36%)  
203 were also inhibited at platform entry. Figure 3H shows the average normalized response (Z-  
204 score) of excited or inhibited responses at tone onset, followed by their responses at platform  
205 entry. This demonstrates that neurons exhibiting platform entry responses are largely distinct  
206 from those exhibiting tone onset responses. Taken together, these results show that initiation of  
207 avoidance is correlated with inhibitory responses in PL at tone onset but not with excitatory or  
208 inhibitory responses at platform entry.

209 Further characterization of inhibitory tone responses in PL revealed that most inhibitory  
210 responses (n=20/25) were not sustained 15 sec after tone onset, whereas 20% (n=5/25) were  
211 sustained throughout the tone (Figure 4A). Inhibition reduced the firing rate from an average of  
212 6Hz to 2 Hz within 1 sec after tone onset (Figure 4B). The majority of neurons showing inhibitory  
213 tone responses were located in rPL (blue, n=22/25) rather than cPL (Figure 4C; purple; n=3/25,  
214 Fisher Exact Test, p=0.0383) and were likely putative projection neurons, based on their spike  
215 width and baseline firing rate (> 225  $\mu$ s, <15 Hz for PL) as shown in Figure 4D (for method, see  
216 Sotres-Bayon et al., 2012). These results suggest that inhibition of rPL projection neurons at  
217 tone onset signals the initiation of active avoidance.

218

### 219 **Countering inhibitory responses in rostral PL neurons delays or prevents avoidance.**

220 Our recording data demonstrate that inhibitory tone responses in rPL correlate with  
221 initiation of avoidance. Because inhibited neurons decreased their firing rate from 6 Hz to 2 Hz  
222 on average (Figure 4B), we reasoned that opposing this decrease should impair initiation of  
223 avoidance. To oppose inhibition, we used channelrhodopsin (ChR2) targeting CAMKII $\alpha$ -positive  
224 neurons to activate rPL neurons at 4 Hz, concurrent with the tone. To confirm our method, we

225 first measured extracellular unit activity in anesthetized rats from Chr2-expressing rPL neurons  
226 exposed to blue light (473nm) illumination (Figure 5A). Figure 5B shows a representative rPL  
227 neuron increasing its firing rate to 4 Hz photoactivation. We found that 4 Hz photoactivation  
228 increased the firing rate in 38% of the neurons and decreased the firing rate in 24% of neurons  
229 (Figure 4C left; n=112, 4 Hz, 30 sec duration, 5 ms pulse width, 8-10 mW illumination, student's  
230 t-test,  $p < 0.05$ ). Photoactivation at 4 Hz increased firing rate from 1.41 Hz to 3.34 Hz on average,  
231 in neurons that were significantly excited (Figure 4C right). We found that photoactivation at 2Hz  
232 increased the firing rate in 46% and decreased the firing rate of 34% of neurons (Figure 4E left;  
233 n=76, 2 Hz, 30 sec duration, 5 ms pulse width, 8-10 mW illumination, student's t-test,  $p < 0.05$ ).  
234 Photoactivation at 2 Hz increased firing rate from 0.4 Hz to 1.16 Hz on average, in neurons that  
235 were significantly excited (Figure 4E right). As expected, 2 Hz photoactivation had a weaker  
236 effect than 4Hz activation on driving spiking activity in rPL neurons.

237 We next infused Chr2 into either the rPL or cPL and began avoidance conditioning 3-4  
238 weeks after AAV infusion (Figure 6A). Following 10 days of avoidance training, rats were  
239 exposed to two tones presented in the absence of shock. PL neurons were illuminated  
240 throughout the first tone (4 Hz, 30 sec), followed by the second tone with the laser off.  
241 Photoactivation of rPL neurons at 4 Hz markedly reduced avoidance expression as reflected in  
242 the total time spent on the platform during the tone (Figure 6B; eYFP-control, n=9, 87% vs.  
243 eYFP-ChR2, n=14, 27%, unpaired t-test,  $t_{(21)} = -4.779$ ,  $p < 0.001$ , Bonferroni corrected). In contrast  
244 to rPL, photoactivation of cPL had no effect on avoidance (Figure 6C&E).

245 A closer examination of the time course of avoidance showed that photoactivation of rPL  
246 significantly reduced avoidance throughout the tone (Figure 6D left; repeated measures  
247 ANOVA, main effect (Group),  $F_{(1)} = 18.642$ ,  $p < 0.001$ , interaction effect (GroupxBins)  $F_{(9)} = 1.156$ ,  
248  $p = 0.326$ , post hoc Tukey test, last 9 3-sec bins, all  $p$ 's  $< 0.01$ ). Photoactivation increased the  
249 latency to avoid in 7/14 rats, and blocked avoidance entirely in 7/14 rats (Figure 6D right; Mann  
250 Whitney U test,  $p < 0.001$ ), but it did not affect freezing (Figure 6D inset; eYFP-control 9% vs

251 eYFP-ChR2 14% time freezing, unpaired t-test,  $p=0.275$ ). Reducing the rate of photoactivation  
252 to 2Hz in rPL eliminated the effects on time course and latency of avoidance (Figure 6F).  
253 Furthermore, shifting the 30 sec of 4 Hz photoactivation to the inter-tone interval did not impair  
254 avoidance (Figure 6G). Thus, the photostimulation-induced impairment of avoidance showed  
255 specificity with respect to location, time, and frequency. Finally, reducing the duration of 4 Hz  
256 photoactivation from 30 sec to the first 15 sec of the tone delayed, but did not prevent,  
257 avoidance as indicated by time on platform (Figure 6H left; Mann Whitney U test,  $p's < 0.05$  at 9-  
258 15 sec) and avoidance latency (Figure 6H right, unpaired t-test,  $t_{(17)}=3.363$ ,  $p=0.0037$ ).  
259 Photoactivation of rPL at 4 Hz had no effect on locomotion, as indicated by distance traveled in  
260 an open field test during a 30 sec period (eYFP-control  $n=11$ , 2.71 m vs. eYFP-ChR2,  $n=15$ ,  
261 2.25 m, unpaired t-test,  $p=0.356$ ). Nor did it affect anxiety levels, as both groups spent a similar  
262 amount of time in the center of the open field (eYFP-control = 2.6727 sec vs. eYFP-ChR2 =  
263 2.6733 sec, unpaired t-test,  $p=0.999$ ). These findings are consistent with the hypothesis that  
264 initiation of avoidance depends on tone-induced inhibition in rPL neurons.

265

## 266 **Discussion**

267 We investigated the neural mechanisms of the initiation of active avoidance. Whereas  
268 pharmacological inactivation of PL delayed initiation of avoidance, optogenetic silencing did not.  
269 Single-unit recordings revealed that initiation of avoidance was correlated with inhibitory, rather  
270 than excitatory, tone responses of rostral PL neurons. Consistent with this, optogenetically  
271 activating rPL neurons to oppose tone-induced inhibition delayed or prevented the initiation of  
272 avoidance. These findings add to the growing body of evidence showing that inhibition within PL  
273 is key for conditioned behavior (Ehrlich et al., 2009, Cioocchi et al., 2010, Sotres-Bayon et al.,  
274 2012, Sparta et al., 2014) and highlight the importance of using in vivo recordings to guide  
275 optogenetic manipulations of behavior.

276 Our findings extend previous findings that PL activity is necessary for avoidance  
277 expression (Bravo-Rivera et al., 2014) by showing that PL processing contributes more to early,  
278 rather than late, avoidance. Our findings appear to be at odds with prior cFos studies, showing  
279 that the expression of active avoidance is correlated with increased activity in PL (Martinez et  
280 al., 2013, Bravo-Rivera et al., 2015). Importantly, the excitatory responses we observed in PL  
281 neurons were associated with either sensory correlates of the tone, or motor correlates of  
282 platform entry, compared to naïve controls. Thus, previously observed increases in cFos  
283 expression may represent sensory and/or motor features of avoidance-like behavior rather than  
284 avoidance itself, which was correlated only with inhibitory responses in PL. This resembles  
285 recent findings in the basolateral amygdala, where increased activity in some neurons were  
286 correlated with the cessation of movement, irrespective of motivation or valence (Amir et al.,  
287 2015, Pare and Quirk, 2017).

288 Previous work on PL has focused on its necessity for the expression of freezing during  
289 fear conditioning (Baeg et al., 2001, Vidal-Gonzalez et al., 2006, Burgos-Robles et al., 2009,  
290 Sierra-Mercado et al., 2011). However, in platform-mediated avoidance, freezing is either not  
291 reduced (Bravo-Rivera et al., 2014) or is increased (present study) by pharmacological  
292 inactivation of PL, suggesting that avoidance training alters the freezing circuit. Prior  
293 manipulations of prefrontal, amygdala, and striatal areas dissociated the expression of  
294 avoidance from the expression of freezing in this task (Bravo-Rivera et al., 2014, Rodriguez-  
295 Romaguera et al., 2016). Furthermore, we observed that stimulation of PL at 4 Hz impaired  
296 avoidance without increasing freezing. Thus, impaired avoidance is not a result of freezing-  
297 induced blockade of avoidance (Lazaro-Munoz et al., 2010).

298 Neurons in rPL project to the ventral striatum (VS; Sesack et al., 1989, Vertes, 2004),  
299 another region necessary for avoidance in this task (Bravo-Rivera et al., 2014) as well as other  
300 avoidance tasks (Darvas et al., 2011, Ramirez et al., 2015, Hormigo et al., 2016). Inputs to VS  
301 from rPL may be necessary for the initiation of platform-mediated avoidance via disinhibition of

302 VS output, similar to appetitive behaviors where inputs to VS must be inhibited to trigger  
303 foraging for food (Rada et al., 1997, Saulskaya and Mikhailova, 2002, Do-Monte et al., 2017).  
304 The VS also receives input from the basolateral amygdala (BLA; McDonald, 1991, Wright et al.,  
305 1996, Groenewegen et al., 1999, Pitkänen et al., 2000), and this projection was recently  
306 implicated in the expression of shuttle avoidance (Ramirez et al., 2015). One possibility is that  
307 inputs from both rPL and BLA projecting to VS may be involved in avoidance, with rPL inputs  
308 initiating early avoidance, and BLA inputs initiating late avoidance. Thus, as the tone progresses  
309 and shock becomes more imminent, direct BLA inputs to VS are recruited. More work is needed  
310 to test this hypothesis.

311 We delayed avoidance initiation by photostimulating at 4 Hz, which was the average  
312 decrease in firing rate in neurons showing inhibitory responses to the tone. This rate of  
313 stimulation is much lower than the 20+ Hz used in previous behavioral studies employing  
314 channelrhodopsin (Liu et al., 2012, Felix-Ortiz and Tye, 2014, Marcinkiewicz et al., 2016,  
315 Villaruel et al., 2017, Warlow et al., 2017). Moreover, we have previously observed that  
316 photoactivation of infralimbic prefrontal cortex at rates  $\geq 10$  Hz was needed to reduce  
317 conditioned freezing (Do-Monte et al., 2015a). As 4 Hz is close to the average firing rate of  
318 mPFC putative projection neurons (Jung et al., 1998, Baeg et al., 2001, Burgos-Robles et al.,  
319 2009, Sotres-Bayon et al., 2012), the delay in avoidance was likely due to a reduction of  
320 neuronal inhibition rather than excitation above baseline. However, an important caveat is that  
321 CamKII $\alpha$ -expressing neurons were activated indiscriminately, and were not limited to neurons  
322 showing inhibitory responses to the tone. Thus, in addition to reducing inhibitory responses in  
323 one population of cells, we likely induced excitation in another population of cells that do not  
324 normally express inhibitory tone responses. Both mechanisms would have the effect of  
325 increasing tone-induced activity at rPL targets, which could account for the more robust effect of  
326 photoactivation vs. muscimol inactivation on the initiation of avoidance.

327           There are multiple sources of input to rPL capable of driving inhibition during the tone.  
328 PL receives input from the BLA, vHPC, and OFC (Bacon et al., 1996, Vertes, 2006, Hoover and  
329 Vertes, 2007). BLA inputs to rPL are tone-responsive and robust, however, they appear to be  
330 excitatory (Orozco-Cabal et al., 2006, Little and Carter, 2012, Little and Carter, 2013),  
331 communicating auditory conditioned responses (Senn et al., 2014, Cheriyan et al., 2016,  
332 Burgos-Robles et al., 2017). Indeed, inactivating BLA reduces the CS-responsiveness of PL  
333 neurons (Laviolette et al., 2005, Sotres-Bayon et al., 2012). A more likely candidate for inhibitory  
334 input is the ventral hippocampus (vHPC), as inactivation of this area increases conditioned tone  
335 responses of PL neurons (Sotres-Bayon et al., 2012). Consistent with this, other studies have  
336 demonstrated that vHPC targets interneurons in the prefrontal cortex (Gabbott et al., 2002,  
337 Ishikawa and Nakamura, 2003, Tierney et al., 2004). Whereas vHPC activity is necessary to  
338 acquire fear (Maren and Holt, 2004, Sierra-Mercado et al., 2011, Chen et al., 2016), it is  
339 unknown whether vHPC activity is necessary for avoidance.

340           Excessive avoidance of stimuli that are not dangerous is clinically relevant for PTSD and  
341 other anxiety disorders. Rodent PL is thought to be homologous to the dorsal anterior cingulate  
342 (dACC) in humans (Bicks et al., 2015, Heilbronner et al., 2016). Although it is difficult to link unit  
343 recording findings with BOLD responses in fMRI studies, decreased activity in human dACC  
344 was correlated with active avoidance (Schlund et al., 2015), and avoidance has been correlated  
345 with functional connectivity between rostral dACC and striatum (Collins et al., 2014). In PTSD  
346 patients, avoidance symptoms correlate with excessive activity in rostral dACC (Marin et al.,  
347 2016). Together with our findings, this suggests that compromised inhibitory control of rostral  
348 dACC may predispose individuals to express avoidance when it competes with a high  
349 behavioral cost, and/or when it is not urgent.

## 350 **Methods**

### 351 *Subjects*

352 A total of 156 adult male Sprague Dawley rats (Harlan Laboratories, Indianapolis, IN)  
353 aged 3-5 months and weighing 320-420 g were housed and handled as previously described  
354 (Bravo-Rivera et al., 2014). Rats were maintained on a restricted diet (18 g/day) of standard  
355 laboratory rat chow to facilitate pressing a bar for food on a variable interval schedule of  
356 reinforcement (VI-30). All procedures were approved by the Institutional Animal Care and Use  
357 Committee of the University of Puerto Rico School of Medicine in compliance with the National  
358 Institutes of Health guidelines for the care and use of laboratory animals.

### 359 *Surgery*

360 Rats were anesthetized with isoflurane inhalant gas (5%) first in an induction chamber  
361 then positioned in a stereotaxic frame (Kopf Instruments, Tujunga, CA). Isoflurane (2-3%) was  
362 delivered through a facemask for anesthesia maintenance. For pharmacological inactivations,  
363 rats were implanted with 26-gauge double guide cannulas (Plastics One, Roanoke, VA) in the  
364 prelimbic prefrontal cortex (PL; +3.0 mm AP;  $\pm$ 0.6 mm ML; -2.5 mm DV, 0° angle) to bregma).  
365 For optogenetic experiments, rats were bilaterally implanted with 22-gauge single guide  
366 cannulas (Plastics One, Roanoke, VA) in the prelimbic prefrontal cortex (PL; +2.6-2.8 mm AP;  
367  $\pm$ 1.50 mm ML; -3.40 mm DV to bregma, 15° angle). An injector extending 2 mm beyond the tip of  
368 each cannula was used to infuse 0.5  $\mu$ l of virus at a rate of 0.05  $\mu$ l/min. The injector was kept  
369 inside the cannula for an additional 10 min to reduce back-flow. The injector was then removed  
370 and an optical fiber (0.22 NA, 200 nm core, constructed with products from Thorlabs, Newton,  
371 NJ) with 1 mm of projection beyond the tip of each cannula was inserted for PL illumination. The  
372 guide cannula and the optical fiber were cemented to the skull (C&B metabond, Parkell,  
373 Brentwood, NY; Ortho Acrylic, Bayamón, PR). For unit recording experiments, rats were  
374 implanted with a moveable array of 9 or 16 microwires (50  $\mu$ m spacing, 3x3 or 2 x 8, Neuro  
375 Biological Laboratories, Denison, TX) targeting regions of PL along the rostral-caudal axis. After



376 surgery, triple antibiotic was applied topically around the surgery incision, and an analgesic  
377 (Meloxicam, 1 mg/Kg) was injected subcutaneously. Rats were allowed a minimum of 7 days to  
378 recover from surgery prior to behavioral training.

### 379 *Behavior*

380 Rats were initially trained to press a bar to receive food pellets on a variable interval  
381 reinforcement schedule (VI-30) inside standard operant chambers (Coulbourn Instruments,  
382 Whitehall, PA) located in sound-attenuating cubicles (MED Associates, St. Albans, VT). Bar-  
383 pressing was used to maintain a constant level of activity against which avoidance and freezing  
384 could reliably be measured. Rats were trained until they reached a criterion of  $\geq 15$  presses/min.  
385 Rats pressed for food throughout all phases of the experiment.

386 For platform-mediated avoidance, rats were trained as previously described (Bravo-  
387 Rivera et al., 2014). Briefly, rats were conditioned with a pure tone (30 s, 4 kHz, 75 dB) co-  
388 terminating with a scrambled shock delivered through the floor grids (2 s, 0.4 mA). The inter-trial  
389 interval was variable, averaging 3 min. An acrylic square platform (14.0 cm each side, 0.33 cm  
390 tall) located in the opposite corner of the sucrose pellet-delivering bar protected rats from the  
391 shock. The platform was fixed to the floor and was present during all stages of training  
392 (including bar-press training). Rats were conditioned for 10 days, with 9 tone-shock pairings per  
393 day with a VI-30 schedule maintained across all training and test sessions. The availability of  
394 food on the side opposite to the platform motivated rats to leave the platform during the inter-  
395 trial interval, facilitating trial-by-trial assessment of avoidance. Once rats learned platform-  
396 mediated avoidance, rats underwent a 2-tone expression test (2 tones with no shock).

### 397 *Drug infusions*

398 The GABA-A agonist muscimol (fluorescent muscimol, BODIPY TMR-X conjugate,  
399 Sigma-Aldrich) was used to enhance GABA-A receptor activity, thereby inactivating target  
400 structures. Infusions were made 45 min before testing at a rate of 0.2  $\mu$ l/min (0.11 nmol/ 0.2  $\mu$ l/

401 per side), similar to our previous studies (Do-Monte et al., 2015b, Rodriguez-Romaguera et al.,  
402 2016).

#### 403 *Viruses*

404 The adeno-associated viruses (AAVs; serotype 5) were obtained from the University of  
405 North Carolina Vector Core (Chapel Hill, NC). Viral titers were  $4 \times 10^{12}$  particles/ml for  
406 channelrhodopsin (AAV5:CaMKII $\alpha$ ::hChR2(H134R)-eYFP) and archaerhodopsin  
407 (AAV5:CaMKII $\alpha$ ::eArchT3.0-eYFP) and  $3 \times 10^{12}$  particles/ml for control (AAV5:CaMKII $\alpha$ ::eYFP).  
408 Rats expressing eYFP in PL were used to control for any nonspecific effects of viral infection or  
409 laser heating. The CaMKII $\alpha$  promoter was used to enable transgene expression favoring  
410 pyramidal neurons (Liu and Jones, 1996). Viruses were housed in a  $-80^{\circ}$  C freezer until the day  
411 of infusion.

#### 412 *Laser delivery*

413 Rats expressing channelrhodopsin (ChR2) in PL were illuminated using a blue diode-  
414 pump solid state laser (DPSS, 473 nm, 2 or 4 Hz, 5 ms pulse width, 8-10 mW at the optical fiber  
415 tip; OptoEngine, Midvale, UT), similar to our previous study (Do-Monte et al., 2015a). Rats  
416 expressing archaerhodopsin (Arch) in PL were bilaterally illuminated using a DPSS green laser  
417 (532 nm, constant, 10-12 mW at the optical fiber tip; OptoEngine). For both ChR2 and Arch  
418 experiments, the laser was activated at tone onset and persisted throughout the 30 s tone  
419 presentation. Laser light was passed through a shutter/coupler (200 nm, Oz Optics, Ontario,  
420 Canada), patchcord (200 nm core, ThorLabs, Newton, NJ), rotary joint (200 nm core, 2 x 2,  
421 Doric Lenses, Quebec city, Canada), dual patchcord (0.22 NA, 200 nm core, ThorLabs), and  
422 bilateral optical fibers (made in-house with materials from ThorLabs and Precision Fiber  
423 Products, Milpitas, CA) targeting the specific subregions in PL. Rats were familiarized with the  
424 patchcord during bar press training and during the last 4 d of avoidance training before the  
425 expression test.

#### 426 *Single-unit recordings*

427 Rats implanted with moveable electrode arrays targeting PL were either avoidance  
428 conditioned as previously described or exposed to the training environment (platform, tone  
429 presentations, behavior box) in the absence of the shock. Extracellular waveforms that  
430 exceeded a voltage threshold were digitized at 40 kHz and stored on a computer. Waveforms  
431 were then sorted offline using three-dimensional plots of principal component and voltage  
432 vectors (Offline Sorter; Plexon, Dallas, TX) and clusters formed by individual neurons were  
433 tracked. Timestamps of neural spiking and flags for the occurrence of tones and shocks were  
434 imported to NeuroExplorer for analysis (NEX Technologies, Madison, AL). Because we used a  
435 high impedance electrode in the current study (~750-1000 kOhm), we were unable to sample  
436 interneurons. Data was recorded during the entire session except during the 2 sec shock. After  
437 conditioning, rats were tested for avoidance expression. For avoidance assessment, rats  
438 received full conditioning sessions (with shocks) across days. Inclusion of the shock prevented  
439 extinction of avoidance. After each day, electrodes were lowered 150  $\mu$ M to isolate new neurons  
440 for the following session the next day. To detect tone-elicited changes in PL activity, we  
441 assessed whether neurons changed their firing rate significantly during the first 500-1000 ms  
442 after tone onset across the first 5 trials. A Z-score for each 500 ms bin was calculated relative to  
443 20 pre-tone bins of equal duration (10 sec pre-tone). PL neurons were classified as showing  
444 excitatory tone responses if the initial bins exceeded 2.58 z's ( $p < 0.01$ , two-tailed). PL neurons  
445 were classified as showing inhibitory tone responses across time if any of the initial two tone  
446 bins exceeded -1.96 Z's ( $p < 0.05$ , two-tailed). To detect changes in PL activity during platform  
447 entry, we employed the same procedure used for assessing tone responses. We assessed  
448 whether neurons changed their firing rate significantly during the first 500-1000 ms after  
449 platform entry. A Z-score for each 500 ms bin was calculated relative to the same pre-tone  
450 baseline. Heat maps of single unit data were generated with Z-scores from baseline through the  
451 28 sec after tone onset or platform entry.

452 *Optrode recordings*

453 Rats expressing Arch or ChR2 in PL were anesthetized with urethane (1g/Kg, i.p.; Sigma  
454 Aldrich) and mounted in a stereotaxic frame. An optrode consisting of an optical fiber  
455 surrounded by 8 or 16 single-unit recording wires (Neuro Biological Laboratories) was inserted  
456 and aimed at PL (AP, +2.8 mm; ML: -0.5; DV: -3.5). The optrode was ventrally advanced in  
457 steps of 0.03 mm. Single-units were monitored in real time (RASPUTIN, Plexon). After isolating  
458 a single-unit, a 532 nm laser was activated for 10 sec within a 20 sec period, at least 10 times  
459 for Arch-infected PL neurons. For ChR2-infected PL neurons, a 473 nm laser was activated for  
460 30s at a rate of 2 or 4 Hz (5 ms pulse width) within a 90s period (60s ITI), at least 5 times.  
461 Single-units were recorded and stored for spike sorting (Offline Sorter, Plexon) and spike-train  
462 analysis (Neuorexplorer, NEX Technologies). Excitatory and inhibitory responses were  
463 calculated by comparing the average firing rate of each neuron during the 10 sec of laser OFF  
464 with the 10 sec of laser ON for Arch neurons and during 30 sec laser OFF just prior to the 30  
465 sec of laser ON for ChR2 neurons (Paired t-test, 1 s bins).

#### 466 *Open field task*

467 Locomotor activity in the open field arena (90 cm diameter) was automatically assessed  
468 (ANY-Maze) by comparing the total distance travelled between 30 sec trials (laser off versus  
469 laser on), following a 3 min acclimation period for optogenetic experiments. The distance  
470 traveled was used to assess locomotion and time in center was used to assess anxiety. For  
471 pharmacological inactivation experiments, distance traveled and time in center was measured  
472 over a 3 min period following a 3 min acclimation period 45 min after MUS or SAL was infused  
473 prior to sacrificing animals.

#### 474 *Histology*

475 After behavioral experiments, rats were deeply anesthetized with sodium pentobarbital  
476 (450 mg/kg i.p.) and transcardially perfused with 0.9 % saline followed by a 10 % formalin  
477 solution. Brains were removed from the skull and stored in 30 % sucrose for cryoprotection for

478 at least 72 h before sectioning and Nissl staining. Histology was analyzed for placement of  
479 cannulas, virus expression, and electrodes.

#### 480 *Data Collection and Analysis*

481 Behavior was recorded with digital video cameras (Micro Video Products, Peterborough,  
482 Ontario, Canada). Freezing and platform avoidance was quantified by observers blind to the  
483 experimental group. Freezing was defined as the absence of all movement except for  
484 respiration. Avoidance was defined as the rat having at least three paws on the platform. In a  
485 subset of animals, AnyMaze software was available for recording and calculating freezing and  
486 avoidance (Stoelting, Wood Dale, IL). The time spent avoiding during the tone (percent time on  
487 platform) was used as our avoidance measure. Avoidance and freezing to the tone was  
488 expressed as a percentage of the 30 second tone presentation. Our experimental groups  
489 typically consisted of approximately 15 animals. This is typical of other laboratories and results  
490 in sufficient statistical confidence. Moreover, it also agrees with the theoretical minimum sample  
491 size given by:

$$492 \quad n = \frac{z^2 \sigma^2}{d^2}$$

493 where  $z$  = the level of confidence desired (in standard deviations),  $\sigma$  = the estimate of the  
494 population standard deviation, and  $d$  = the acceptable width of the confidence interval.

495 Technical replications, testing the same measurement multiple times, and biological  
496 replications, performing the same test on multiple samples (individual rats or single units), were  
497 used to test the variability in each experiment. Statistical significance was determined with  
498 Student's two-tailed t-tests, Fisher Exact tests, Chi Square tests, Mann Whitney U tests, or  
499 repeated-measures ANOVA, followed by post hoc Tukey analysis, and Bonferroni corrections,  
500 where appropriate using STATISTICA (Statsoft, Tulsa, OK) and Prism (Graphpad, La Jolla, CA).

501

502 Figure Legends.

503 **Figure 1. Pharmacological inactivation of prelimbic cortex delays avoidance. A.**

504 Schematic of MUS infusion showing min (dark orange) and max (light orange) extent of infusion  
505 in PL. **B.** Rats were trained across 10 days to avoid a tone-signal foot-shock by stepping onto  
506 a platform. On Day 11, rats received 2 tone presentations (without shock) 45 min after MUS  
507 infusion. On Day 12, rats received a second 2-tone test drug free. **C.** Percent time on platform  
508 during Tone 1 on Days 10, 11 (with MUS), and 12 for saline controls (SAL, n=17; grey) and  
509 MUS rats (n=13, orange). **D.** Time spent on platform in 3 sec bins (Tone 1, Test 1) revealed that  
510 MUS rats were significantly delayed in their avoidance compared to SAL controls (repeated  
511 measures ANOVA, post hoc Tukey test). **E.** Latency of avoidance for each rat (Mann Whitney U  
512 Test, Tone 1, Test 1). *Inset:* Effect of MUS inactivation (Tone 1, test 1) on freezing during the  
513 tone (unpaired t-test). Data are shown as mean  $\pm$  SEM; \*p<0.05, \*\*p<0.01.

514

515 **Figure 2. Optogenetic silencing of prelimbic neurons does not delay avoidance. A. Left:**

516 Schematic of Arch expression and optrode placement (n=2 rats). *Middle:* Rasters and  
517 peristimulus time histogram of a single PL neuron showing a decrease in firing rate during laser  
518 illumination (8-10mW, 532nm, 10s ON, 10s OFF, 10 trials). *Right:* Proportion of PL neurons that  
519 exhibited a decrease (blue, n=41), increase (gold, n=11), or no change (grey, n=18) in firing  
520 rate. **B.** Schematic of virus infusion, location of min/max expression of AAV in rPL (pink) and  
521 cPL (purple), followed by avoidance training and test. At Test, 532nm light was delivered to rPL  
522 or cPL during the entire 30-second tone presentation (Tone 1). **C. Left:** Micrograph of Arch  
523 expression and optical fiber placement in rPL. *Right:* Percent time on platform at Cond (Day 10,  
524 Tone 1) and Test (Day 11, Tone 1 with laser ON and Tone 2 with laser OFF) for eYFP-rPL  
525 control (n=15, grey) and Arch-rPL rats (n=17, green). **D. Left:** Micrograph of Arch expression  
526 and optical fiber placement in cPL. *Right:* Percent time on platform during Cond and Test for  
527 eYFP-cPL control (n=7, grey) and Arch-cPL rats (n=9, green). **E. Left:** Time spent on platform in

528 3 sec bins (Tone 1 at Test) revealed no effect of silencing rPL-Arch neurons compared to eYFP  
529 controls (repeated measures ANOVA, post hoc Tukey test). *Right:* Latency of avoidance for  
530 each rat (Tone 1 at Test). rPL-Arch rats showed a decrease in avoidance latency (Mann  
531 Whitney U test,  $p < 0.05$ ). **F.** Timeline of avoidance (left) and latency (right) for cPL-eYFP control  
532 rats and cPL-Arch rats. All data are shown as mean  $\pm$  SEM;  $p < 0.05$ .

533

534 **Figure 3. Initiation of avoidance is correlated with inhibition in rostral PL neurons. A.**

535 Location of recordings across PL (n=7 avoidance-trained and n=8 naïve rats). **B.** *Left:* Cartoon

536 of rat behavior at tone onset during unit recordings. *Right:* single unit examples of an excitatory

537 (gold rasters) and inhibitory tone response (blue rasters). Each row represents a single trial. **C.**

538 Percentage of neurons that were excitatory (gold) or inhibitory (blue) throughout the tone. Time

539 of platform entry (black dots), for all successful trials (n=340) in avoidance rats is indicated

540 relative to tone onset. **D.** *Left:* Heat map of normalized responses (z-score) to tone onset (Time

541 = 0 sec) of neurons in avoidance rats. Each row represents one neuron, bin = 0.5 sec. Arrows

542 indicate bins used to determine criteria for excitatory (gold, first 500ms bin), or inhibitory (blue,

543 first or second 500ms bin) tone responses. *Right:* Pie charts showing proportions of neurons

544 that were excited, inhibited, or non-responsive at tone onset in avoidance (n = 34, 25, 182,

545 respectively), naïve (n = 20, 3, 143, respectively), and fear conditioned rats (n = 25, 3, 163,

546 respectively). Proportion of inhibitory responses were significantly greater in avoidance rats

547 compared to naïve and fear rats (Chi Square test,  $**p < 0.001$ ). *Bottom:* Percentage of cells that

548 were excited in avoidance (gold) or naïve (light gold) rats (left) or inhibited in avoidance (blue) or

549 naïve (light blue) rats (right) around tone onset (Fisher exact tests). **E.** *Left:* Cartoon of rat

550 entering platform after tone onset during unit recordings. *Right:* single unit examples of an

551 excitatory (gold rasters) and inhibitory platform entry response (blue rasters). **F.** Percentage of

552 neurons that were excitatory (gold) or inhibitory (blue) at platform entry. Time of tone onset

553 (black dots), for all successful trials (n=340) in avoidance rats is indicated relative to platform

554 entry. **G. Left:** Heat map of normalized responses to platform entry (Time = 0 sec) of neurons in  
555 avoidance rats. *Right:* Pie charts showing proportions of neurons that were excited, inhibited, or  
556 non-responsive at platform entry in avoidance (n = 40, 22, 156, respectively) and naïve rats (n =  
557 23, 10, 127, respectively). *Bottom:* Percentage of cells that were excited in avoidance (gold) or  
558 naïve (light gold) rats (left) or inhibited in avoidance (blue) or naïve (light blue) rats (right) after  
559 platform entry (Fisher exact tests). **H.** Tone responsive neurons were not responsive to platform  
560 entry. All data are shown as mean  $\pm$  SEM; \*p<0.05, \*\*p<0.01.

561

562 **Figure 4. Characterization of inhibitory tone responsive neurons.** **A.** Normalized firing rate  
563 of cells that were inhibited for less than 15 sec (dark blue) or more than 15 sec (light blue) after  
564 tone onset. **B.** Average inhibitory response of neurons decreased from a baseline firing rate of  
565 5.8 Hz to 1.98 Hz at tone onset. **C. Left:** sagittal view of location of inhibitory tone responsive  
566 neurons in rPL (blue) or cPL (purple). *Right:* Histological analysis revealed that more inhibited  
567 neurons were located in rPL (Fisher Exact Test). **D.** Classification of PL neurons into putative  
568 projection neurons (gray triangle) or interneurons (gray circle) based on spike width and  
569 baseline firing rate (Sotres-Bayon et al, 2012). Neurons showing inhibitory responses  
570 (blue/purple, n=25) were likely projection neurons. All data are shown as mean  $\pm$  SEM; \*p<0.05.

571

572 **Figure 5. 4 Hz photoactivation and single unit recordings of rostral PL neurons in**  
573 **anesthetized rats.** **A.** Schematic of ChR2 expression and optrode placement (n=4 rats). **B.**  
574 Rasters and peristimulus time histograms of a representative single neuron showing increased  
575 firing rate during laser illumination (8-10mW, 473nm, 30s ON, 30s OFF, 4 Hz, 5 trials). **C. Left:**  
576 Proportion of neurons showing an increase (gold, n=43), decrease (blue, n=27), or no change  
577 (grey, n=42) in firing rate with laser ON. *Right:* Average firing rate at baseline (dark grey) and 4  
578 Hz photoactivation for neurons showing increased (gold) changes in firing rate. **D.** Rasters and  
579 peristimulus time histograms of a representative single neuron showing increased firing rate



580 during laser illumination (8-10mW, 473nm, 30s ON, 30s OFF, 2 Hz, 5 trials). **E. Left:** Proportion  
581 of neurons showing an increase (n=35), decrease (n=26), or no change (n=15) in firing rate with  
582 laser ON. *Right:* Average firing rate at baseline, and 2 Hz photoactivation for neurons showing  
583 increased changes in firing rate. All data are shown as mean  $\pm$  SEM.

584

585 **Figure 6. 4 Hz photoactivation of rostral PL neurons during the tone delays or prevents**

586 **avoidance. A.** Schematic of viral infusion and location of min/max spread of AAV expression in  
587 rPL (pink) and cPL (purple), followed by avoidance training and test. At Test, 473nm light was  
588 delivered to rPL or cPL during the first 30-second tone presentation (Tone 1). **B. Left:**

589 Micrograph of ChR2 expression and optical fiber placement in rPL. *Right:* Percent time on

590 platform at Cond (Day 10, Tone 1) and Test (Day 11, Tone 1 with laser ON and Tone 2 with

591 laser OFF) for eYFP-rPL control rats (grey, n=9) and ChR2-rPL rats (blue, n=14). **C. Left:**

592 Micrograph of ChR2 expression and optical fiber placement in cPL. *Right:* Percent time on

593 platform during Cond and Test for eYFP-cPL control rats (grey, n=7) and ChR2-cPL rats (blue,

594 n=9). **D. Left:** Time spent on platform in 3 sec bins (Tone 1 at Test) revealed that rPL-ChR2 rats

595 were significantly delayed in their avoidance compared to eYFP controls (repeated measures

596 ANOVA, post hoc Tukey test). *Right:* Latency of avoidance for each rat (Mann Whitney U Test,

597 Tone 1 at Test). 7/14 rats never avoided. *Inset:* 4 Hz photoactivation in rPL had no effect on

598 freezing (Tone 1 at Test). **E.** Timeline of avoidance (left) and latency (right) for eYFP-cPL

599 control ChR2-cPL rats revealed no effect of 4 Hz photoactivation of caudal PL. **F.** Timeline of

600 avoidance (left) and latency (right) for eYFP-rPL control rats (grey, n=9) and ChR2-rPL rats

601 (blue, n=9) revealed no effect of 2 Hz photoactivation. **G.** Timeline of avoidance (left) and

602 latency (right) for eYFP-rPL control rats (grey, n=8) and ChR2-rPL rats (blue, n=13) revealed no

603 effect of 4Hz photoactivation during a 30 sec ITI period. **H.** Timeline of avoidance (left) and

604 latency (right) for eYFP-rPL control rats (grey, n=10) and ChR2-rPL rats (blue, n=9) revealed a

605 delay in the initiation of avoidance with 4Hz photoactivation during the first 15 sec of the tone

606 (Mann Whitney U test for time course and avoidance latency). All data are shown as mean  $\pm$   
607 SEM; \* $p < 0.05$ ; \*\* $p < 0.01$ .

608

609 **Video 1. 4 Hz photoactivation of rostral PL neurons during the tone impairs avoidance.**

610 Video of an individual rat with ChR2 infused into rPL showing avoidance behavior on the last  
611 day of avoidance training (Day 10) at Tone 1, followed by the rat's behavior at Test (Day 11)  
612 with the laser on during the tone (4 Hz, 30 sec duration, 5 ms pulse width, 8-10mW light  
613 intensity).

614

615 References.

- 616 Amir, A., Lee, S. C., Headley, D. B., Herzallah, M. M. and Pare, D. (2015) 'Amygdala Signaling  
617 during Foraging in a Hazardous Environment', *J Neurosci*, 35(38), pp. 12994-3005.
- 618 Bacon, S. J., Headlam, A. J., Gabbott, P. L. and Smith, A. D. (1996) 'Amygdala input to medial  
619 prefrontal cortex (mPFC) in the rat: a light and electron microscope study', *Brain Res.*,  
620 720(1-2), pp. 211-219.
- 621 Baeg, E. H., Kim, Y. B., Jang, J., Kim, H. T., Mook-Jung, I. and Jung, M. W. (2001) 'Fast spiking  
622 and regular spiking neural correlates of fear conditioning in the medial prefrontal cortex  
623 of the rat', *Cereb.Cortex*, 11(5), pp. 441-451.
- 624 Beck, K. D., Jiao, X., Smith, I. M., Myers, C. E., Pang, K. C. and Servatius, R. J. (2014) 'ITI-  
625 Signals and Prelimbic Cortex Facilitate Avoidance Acquisition and Reduce Avoidance  
626 Latencies, Respectively, in Male WKY Rats', *Front Behav Neurosci*, 8, pp. 403.
- 627 Bicks, L. K., Koike, H., Akbarian, S. and Morishita, H. (2015) 'Prefrontal Cortex and Social  
628 Cognition in Mouse and Man', *Front Psychol*, 6, pp. 1805.
- 629 Bravo-Rivera, C., Roman-Ortiz, C., Brignoni-Perez, E., Sotres-Bayon, F. and Quirk, G. J. (2014)  
630 'Neural structures mediating expression and extinction of platform-mediated avoidance',  
631 *J Neurosci*, 34(29), pp. 9736-42.
- 632 Bravo-Rivera, C., Roman-Ortiz, C., Montesinos-Cartagena, M. and Quirk, G. J. (2015)  
633 'Persistent active avoidance correlates with activity in prelimbic cortex and ventral  
634 striatum', *Front Behav Neurosci*, 9, pp. 184.
- 635 Burgos-Robles, A., Bravo-Rivera, H. and Quirk, G. J. (2013) 'Prelimbic and infralimbic neurons  
636 signal distinct aspects of appetitive instrumental behavior', *PLoS One*, 8(2), pp. e57575.
- 637 Burgos-Robles, A., Kimchi, E. Y., Izadmehr, E. M., Porzenheim, M. J., Ramos-Guasp, W. A.,  
638 Nieh, E. H., Felix-Ortiz, A. C., Namburi, P., Leppla, C. A., Presbrey, K. N.,  
639 Anandalingam, K. K., Pagan-Rivera, P. A., Anahtar, M., Beyeler, A. and Tye, K. M.  
640 (2017) 'Amygdala inputs to prefrontal cortex guide behavior amid conflicting cues of  
641 reward and punishment', *Nat Neurosci*, 20(6), pp. 824-835.
- 642 Burgos-Robles, A., Vidal-Gonzalez, I. and Quirk, G. J. (2009) 'Sustained conditioned responses  
643 in prelimbic prefrontal neurons are correlated with fear expression and extinction failure',  
644 *The Journal of neuroscience : the official journal of the Society for Neuroscience*, 29(26),  
645 pp. 8474-82.
- 646 Chang, C. H., Berke, J. D. and Maren, S. (2010) 'Single-unit activity in the medial prefrontal  
647 cortex during immediate and delayed extinction of fear in rats', *PLoS.One.*, 5(8), pp.  
648 e11971.
- 649 Chen, V. M., Foilb, A. R. and Christianson, J. P. (2016) 'Inactivation of ventral hippocampus  
650 interfered with cued-fear acquisition but did not influence later recall or discrimination',  
651 *Behav Brain Res*, 296, pp. 249-253.
- 652 Cheriyan, J., Kaushik, M. K., Ferreira, A. N. and Sheets, P. L. (2016) 'Specific Targeting of the  
653 Basolateral Amygdala to Projectionally Defined Pyramidal Neurons in Prelimbic and  
654 Infralimbic Cortex', *eNeuro*, 3(2).
- 655 Chow, B. Y., Han, X., Dobry, A. S., Qian, X., Chuong, A. S., Li, M., Henninger, M. A., Belfort, G.  
656 M., Lin, Y., Monahan, P. E. and Boyden, E. S. (2010) 'High-performance genetically  
657 targetable optical neural silencing by light-driven proton pumps', *Nature*, 463(7277), pp.  
658 98-102.
- 659 Ciocchi, S., Herry, C., Grenier, F., Wolff, S. B., Letzkus, J. J., Vlachos, I., Ehrlich, I., Sprengel,  
660 R., Deisseroth, K., Stadler, M. B., Muller, C. and Luthi, A. (2010) 'Encoding of  
661 conditioned fear in central amygdala inhibitory circuits', *Nature*, 468(7321), pp. 277-282.
- 662 Collins, K. A., Mendelsohn, A., Cain, C. K. and Schiller, D. (2014) 'Taking action in the face of  
663 threat: neural synchronization predicts adaptive coping', *J Neurosci*, 34(44), pp. 14733-8.

- 664 Courtin, J., Chaudun, F., Rozeske, R. R., Karalis, N., Gonzalez-Campo, C., Wurtz, H., Abdi, A.,  
665 Baufreton, J., Bienvenu, T. C. and Herry, C. (2014) 'Prefrontal parvalbumin interneurons  
666 shape neuronal activity to drive fear expression', *Nature*, 505(7481), pp. 92-6.
- 667 Darvas, M., Fadok, J. P. and Palmiter, R. D. (2011) 'Requirement of dopamine signaling in the  
668 amygdala and striatum for learning and maintenance of a conditioned avoidance  
669 response', *Learning & memory*, 18(3), pp. 136-43.
- 670 Do Monte, F. H., Quirk, G. J., Li, B. and Penzo, M. A. (2016) 'Retrieving fear memories, as time  
671 goes by...', *Mol Psychiatry*, 21(8), pp. 1027-36.
- 672 Do-Monte, F. H., Manzano-Nieves, G., Quiñones-Laracuate, K., Ramos-Medina, L. and Quirk,  
673 G. J. (2015a) 'Revisiting the role of infralimbic cortex in fear extinction with optogenetics',  
674 *J Neurosci*, 35(8), pp. 3607-15.
- 675 Do-Monte, F. H., Minier-Toribio, A., Quiñones-Laracuate, K., Medina-Colón, E. M. and Quirk,  
676 G. J. (2017) 'Thalamic Regulation of Sucrose Seeking during Unexpected Reward  
677 Omission', *Neuron*, 94(2), pp. 388-400.e4.
- 678 Do-Monte, F. H., Quiñones-Laracuate, K. and Quirk, G. J. (2015b) 'A temporal shift in the  
679 circuits mediating retrieval of fear memory', *Nature*, 519(7544), pp. 460-3.
- 680 DSM-V (ed.) (2013) *Diagnostic and statistical manual of mental disorders (5th ed., text rev.)*.
- 681 Ehrlich, I., Humeau, Y., Grenier, F., Ciocchi, S., Herry, C. and Luthi, A. (2009) 'Amygdala  
682 inhibitory circuits and the control of fear memory', *Neuron*, 62(6), pp. 757-771.
- 683 Felix-Ortiz, A. C. and Tye, K. M. (2014) 'Amygdala inputs to the ventral hippocampus  
684 bidirectionally modulate social behavior', *J Neurosci*, 34(2), pp. 586-95.
- 685 Floyd, N. S., Price, J. L., Ferry, A. T., Keay, K. A. and Bandler, R. (2000) 'Orbitomedial  
686 prefrontal cortical projections to distinct longitudinal columns of the periaqueductal gray  
687 in the rat', *J.Comp Neurol.*, 422(4), pp. 556-578.
- 688 Floyd, N. S., Price, J. L., Ferry, A. T., Keay, K. A. and Bandler, R. (2001) 'Orbitomedial  
689 prefrontal cortical projections to hypothalamus in the rat', *J.Comp Neurol.*, 432(3), pp.  
690 307-328.
- 691 Gabbott, P., Headlam, A. and Busby, S. (2002) 'Morphological evidence that CA1 hippocampal  
692 afferents monosynaptically innervate PV-containing neurons and NADPH-diaphorase  
693 reactive cells in the medial prefrontal cortex (Areas 25/32) of the rat', *Brain Res*, 946(2),  
694 pp. 314-22.
- 695 Giustino, T. F. and Maren, S. (2015) 'The Role of the Medial Prefrontal Cortex in the  
696 Conditioning and Extinction of Fear', *Front Behav Neurosci*, 9, pp. 298.
- 697 Groenewegen, H. J., Wright, C. I., Beijer, A. V. and Voorn, P. (1999) 'Convergence and  
698 segregation of ventral striatal inputs and outputs', *Ann N Y Acad Sci*, 877, pp. 49-63.
- 699 Han, X., Chow, B. Y., Zhou, H., Klapoetke, N. C., Chuong, A., Rajimehr, R., Yang, A., Baratta,  
700 M. V., Winkle, J., Desimone, R. and Boyden, E. S. (2011) 'A high-light sensitivity optical  
701 neural silencer: development and application to optogenetic control of non-human  
702 primate cortex', *Frontiers in systems neuroscience*, 5, pp. 18.
- 703 Heilbronner, S. R., Rodriguez-Romaguera, J., Quirk, G. J., Groenewegen, H. J. and Haber, S.  
704 N. (2016) 'Circuit-Based Corticostriatal Homologies Between Rat and Primate', *Biol*  
705 *Psychiatry*, 80(7), pp. 509-21.
- 706 Herry, C. and Johansen, J. P. (2014) 'Encoding of fear learning and memory in distributed  
707 neuronal circuits', *Nat Neurosci*, 17(12), pp. 1644-54.
- 708 Hoover, W. B. and Vertes, R. P. (2007) 'Anatomical analysis of afferent projections to the medial  
709 prefrontal cortex in the rat', *Brain Struct.Funct.*, 212(2), pp. 149-179.
- 710 Hormigo, S., Vega-Flores, G. and Castro-Alamancos, M. A. (2016) 'Basal Ganglia Output  
711 Controls Active Avoidance Behavior', *J Neurosci*, 36(40), pp. 10274-10284.
- 712 Hosking, J. G., Cocker, P. J. and Winstanley, C. A. (2016) 'Prefrontal Cortical Inactivations  
713 Decrease Willingness to Expend Cognitive Effort on a Rodent Cost/Benefit Decision-  
714 Making Task', *Cereb Cortex*, 26(4), pp. 1529-38.

- 715 Ishikawa, A. and Nakamura, S. (2003) 'Convergence and interaction of hippocampal and  
716 amygdalar projections within the prefrontal cortex in the rat', *J.Neurosci.*, 23(31), pp.  
717 9987-9995.
- 718 Isogawa, K., Bush, D. E. and LeDoux, J. E. (2013) 'Contrasting effects of pretraining,  
719 posttraining, and pretesting infusions of corticotropin-releasing factor into the lateral  
720 amygdala: attenuation of fear memory formation but facilitation of its expression',  
721 *Biological psychiatry*, 73(4), pp. 353-9.
- 722 Jiao, X., Beck, K. D., Myers, C. E., Servatius, R. J. and Pang, K. C. (2015) 'Altered activity of the  
723 medial prefrontal cortex and amygdala during acquisition and extinction of an active  
724 avoidance task', *Front Behav Neurosci*, 9, pp. 249.
- 725 Johansen, J. P., Cain, C. K., Ostroff, L. E. and LeDoux, J. E. (2011) 'Molecular mechanisms of  
726 fear learning and memory', *Cell*, 147(3), pp. 509-24.
- 727 Jung, M. W., Qin, Y., McNaughton, B. L. and Barnes, C. A. (1998) 'Firing characteristics of deep  
728 layer neurons in prefrontal cortex in rats performing spatial working memory tasks',  
729 *Cereb Cortex*, 8(5), pp. 437-50.
- 730 Laviolette, S. R., Lipski, W. J. and Grace, A. A. (2005) 'A subpopulation of neurons in the medial  
731 prefrontal cortex encodes emotional learning with burst and frequency codes through a  
732 dopamine D4 receptor-dependent basolateral amygdala input', *J.Neurosci.*, 25(26), pp.  
733 6066-6075.
- 734 Lazaro-Munoz, G., LeDoux, J. E. and Cain, C. K. (2010) 'Sidman instrumental avoidance initially  
735 depends on lateral and basal amygdala and is constrained by central amygdala-  
736 mediated Pavlovian processes', *Biological psychiatry*, 67(12), pp. 1120-7.
- 737 LeDoux, J. E., Moscarello, J., Sears, R. and Campese, V. (2017) 'The birth, death and  
738 resurrection of avoidance: a reconceptualization of a troubled paradigm', *Mol Psychiatry*,  
739 22(1), pp. 24-36.
- 740 Little, J. P. and Carter, A. G. (2012) 'Subcellular synaptic connectivity of layer 2 pyramidal  
741 neurons in the medial prefrontal cortex', *J Neurosci*, 32(37), pp. 12808-19.
- 742 Little, J. P. and Carter, A. G. (2013) 'Synaptic mechanisms underlying strong reciprocal  
743 connectivity between the medial prefrontal cortex and basolateral amygdala', *J Neurosci*,  
744 33(39), pp. 15333-42.
- 745 Liu, X., Ramirez, S., Pang, P. T., Puryear, C. B., Govindarajan, A., Deisseroth, K. and  
746 Tonegawa, S. (2012) 'Optogenetic stimulation of a hippocampal engram activates fear  
747 memory recall', *Nature*, 484(7394), pp. 381-5.
- 748 Liu, X. B. and Jones, E. G. (1996) 'Localization of alpha type II calcium calmodulin-dependent  
749 protein kinase at glutamatergic but not gamma-aminobutyric acid (GABAergic) synapses  
750 in thalamus and cerebral cortex', *Proc Natl Acad Sci U S A*, 93(14), pp. 7332-6.
- 751 Marcinkiewicz, C. A., Mazzone, C. M., D'Agostino, G., Halladay, L. R., Hardaway, J. A., DiBerto,  
752 J. F., Navarro, M., Burnham, N., Cristiano, C., Dorrier, C. E., Tipton, G. J.,  
753 Ramakrishnan, C., Kozicz, T., Deisseroth, K., Thiele, T. E., McElligott, Z. A., Holmes, A.,  
754 Heisler, L. K. and Kash, T. L. (2016) 'Serotonin engages an anxiety and fear-promoting  
755 circuit in the extended amygdala', *Nature*, 537(7618), pp. 97-101.
- 756 Maren, S. and Holt, W. G. (2004) 'Hippocampus and Pavlovian fear conditioning in rats:  
757 muscimol infusions into the ventral, but not dorsal, hippocampus impair the acquisition of  
758 conditional freezing to an auditory conditional stimulus', *Behav.Neurosci.*, 118(1), pp. 97-  
759 110.
- 760 Marin, M. F., Song, H., VanElzakker, M. B., Staples-Bradley, L. K., Linnman, C., Pace-Schott, E.  
761 F., Lasko, N. B., Shin, L. M. and Milad, M. R. (2016) 'Association of Resting Metabolism  
762 in the Fear Neural Network With Extinction Recall Activations and Clinical Measures in  
763 Trauma-Exposed Individuals', *Am J Psychiatry*, 173(9), pp. 930-8.
- 764 Martinez, R. C., Gupta, N., Lazaro-Munoz, G., Sears, R. M., Kim, S., Moscarello, J. M., LeDoux,  
765 J. E. and Cain, C. K. (2013) 'Active vs. reactive threat responding is associated with

- 766 differential c-Fos expression in specific regions of amygdala and prefrontal cortex',  
767 *Learning & memory*, 20(8), pp. 446-52.
- 768 McDonald, A. J. (1991) 'Topographical organization of amygdaloid projections to the  
769 caudatoputamen, nucleus accumbens, and related striatal-like areas of the rat brain',  
770 *Neuroscience*, 44(1), pp. 15-33.
- 771 Moscarello, J. M. and LeDoux, J. E. (2013) 'Active avoidance learning requires prefrontal  
772 suppression of amygdala-mediated defensive reactions', *J Neurosci*, 33(9), pp. 3815-23.
- 773 Orozco-Cabal, L., Pollandt, S., Liu, J., Vergara, L., Shinnick-Gallagher, P. and Gallagher, J. P.  
774 (2006) 'A novel rat medial prefrontal cortical slice preparation to investigate synaptic  
775 transmission from amygdala to layer V prelimbic pyramidal neurons', *J Neurosci*  
776 *Methods*, 151(2), pp. 148-58.
- 777 Pare, D. and Quirk, G. J. (2017) 'When scientific paradigms lead to tunnel vision: lessons from  
778 the study of fear', 2, pp. 6.
- 779 Pendyam, S., Bravo-Rivera, C., Burgos-Robles, A., Sotres-Bayon, F., Quirk, G. J. and Nair, S.  
780 S. (2013) 'Fear signaling in the prelimbic-amygdala circuit: a computational modeling  
781 and recording study', *Journal of neurophysiology*, 110(4), pp. 844-61.
- 782 Pitkänen, A., Jolkkonen, E. and Kempainen, S. (2000) 'Anatomic heterogeneity of the rat  
783 amygdaloid complex', *Folia Morphol (Warsz)*, 59(1), pp. 1-23.
- 784 Rada, P., Tucci, S., Murzi, E. and Hernández, L. (1997) 'Extracellular glutamate increases in the  
785 lateral hypothalamus and decreases in the nucleus accumbens during feeding', *Brain*  
786 *Res*, 768(1-2), pp. 338-40.
- 787 Ramirez, F., Moscarello, J. M., LeDoux, J. E. and Sears, R. M. (2015) 'Active avoidance  
788 requires a serial basal amygdala to nucleus accumbens shell circuit', *J Neurosci*, 35(8),  
789 pp. 3470-7.
- 790 Rodriguez-Romaguera, J., Greenberg, B. D., Rasmussen, S. A. and Quirk, G. J. (2016) 'An  
791 Avoidance-Based Rodent Model of Exposure With Response Prevention Therapy for  
792 Obsessive-Compulsive Disorder', *Biol Psychiatry*, 80(7), pp. 534-40.
- 793 Saulskaya, N. B. and Mikhailova, M. O. (2002) 'Feeding-induced decrease in extracellular  
794 glutamate level in the rat nucleus accumbens: dependence on glutamate uptake',  
795 *Neuroscience*, 112(4), pp. 791-801.
- 796 Schlund, M. W., Brewer, A. T., Richman, D. M., Magee, S. K. and Dymond, S. (2015) 'Not so  
797 bad: avoidance and aversive discounting modulate threat appraisal in anterior cingulate  
798 and medial prefrontal cortex', *Front Behav Neurosci*, 9, pp. 142.
- 799 Senn, V., Wolff, S. B., Herry, C., Grenier, F., Ehrlich, I., Gründemann, J., Fadok, J. P., Müller,  
800 C., Letzkus, J. J. and Lüthi, A. (2014) 'Long-range connectivity defines behavioral  
801 specificity of amygdala neurons', *Neuron*, 81(2), pp. 428-37.
- 802 Sesack, S. R., Deutch, A. Y., Roth, R. H. and Bunney, B. S. (1989) 'Topographical organization  
803 of the efferent projections of the medial prefrontal cortex in the rat: an anterograde tract-  
804 tracing study with Phaseolus vulgaris leucoagglutinin', *J Comp Neurol*, 290(2), pp. 213-  
805 42.
- 806 Sierra-Mercado, D., Padilla-Coreano, N. and Quirk, G. J. (2011) 'Dissociable roles of prelimbic  
807 and infralimbic cortices, ventral hippocampus, and basolateral amygdala in the  
808 expression and extinction of conditioned fear', *Neuropsychopharmacology*, 36(2), pp.  
809 529-538.
- 810 Sotres-Bayon, F., Sierra-Mercado, D., Pardilla-Delgado, E. and Quirk, G. J. (2012) 'Gating of  
811 fear in prelimbic cortex by hippocampal and amygdala inputs', *Neuron*, 76(4), pp. 804-  
812 12.
- 813 Sparta, D. R., Hovelsø, N., Mason, A. O., Kantak, P. A., Ung, R. L., Decot, H. K. and Stuber, G.  
814 D. (2014) 'Activation of prefrontal cortical parvalbumin interneurons facilitates extinction  
815 of reward-seeking behavior', *J Neurosci*, 34(10), pp. 3699-705.

- 816 Tierney, P. L., Degenetais, E., Thierry, A. M., Glowinski, J. and Gioanni, Y. (2004) 'Influence of  
817 the hippocampus on interneurons of the rat prefrontal cortex', *Eur.J.Neurosci.*, 20(2), pp.  
818 514-524.
- 819 Vertes, R. P. (2004) 'Differential projections of the infralimbic and prelimbic cortex in the rat',  
820 *Synapse*, 51(1), pp. 32-58.
- 821 Vertes, R. P. (2006) 'Interactions among the medial prefrontal cortex, hippocampus and midline  
822 thalamus in emotional and cognitive processing in the rat', *Neuroscience*, 142(1), pp. 1-  
823 20.
- 824 Vidal-Gonzalez, I., Vidal-Gonzalez, B., Rauch, S. L. and Quirk, G. J. (2006) 'Microstimulation  
825 reveals opposing influences of prelimbic and infralimbic cortex on the expression of  
826 conditioned fear', *Learn.Mem.*, 13(6), pp. 728-733.
- 827 Villaruel, F. R., Lacroix, F., Sanio, C., Sparks, D. W., Chapman, C. A. and Chaudhri, N. (2017)  
828 'Optogenetic Activation of the Infralimbic Cortex Suppresses the Return of Appetitive  
829 Pavlovian-Conditioned Responding Following Extinction', *Cereb Cortex*, pp. 1-12.
- 830 Warlow, S. M., Robinson, M. J. F. and Berridge, K. C. (2017) 'Optogenetic Central Amygdala  
831 Stimulation Intensifies and Narrows Motivation for Cocaine', *J Neurosci*, 37(35), pp.  
832 8330-8348.
- 833 Wright, C. I., Beijer, A. V. and Groenewegen, H. J. (1996) 'Basal amygdaloid complex afferents  
834 to the rat nucleus accumbens are compartmentally organized', *J Neurosci*, 16(5), pp.  
835 1877-93.
- 836 Zeeb, F. D., Baarendse, P. J., Vanderschuren, L. J. and Winstanley, C. A. (2015) 'Inactivation of  
837 the prelimbic or infralimbic cortex impairs decision-making in the rat gambling task',  
838 *Psychopharmacology (Berl)*, 232(24), pp. 4481-91.  
839

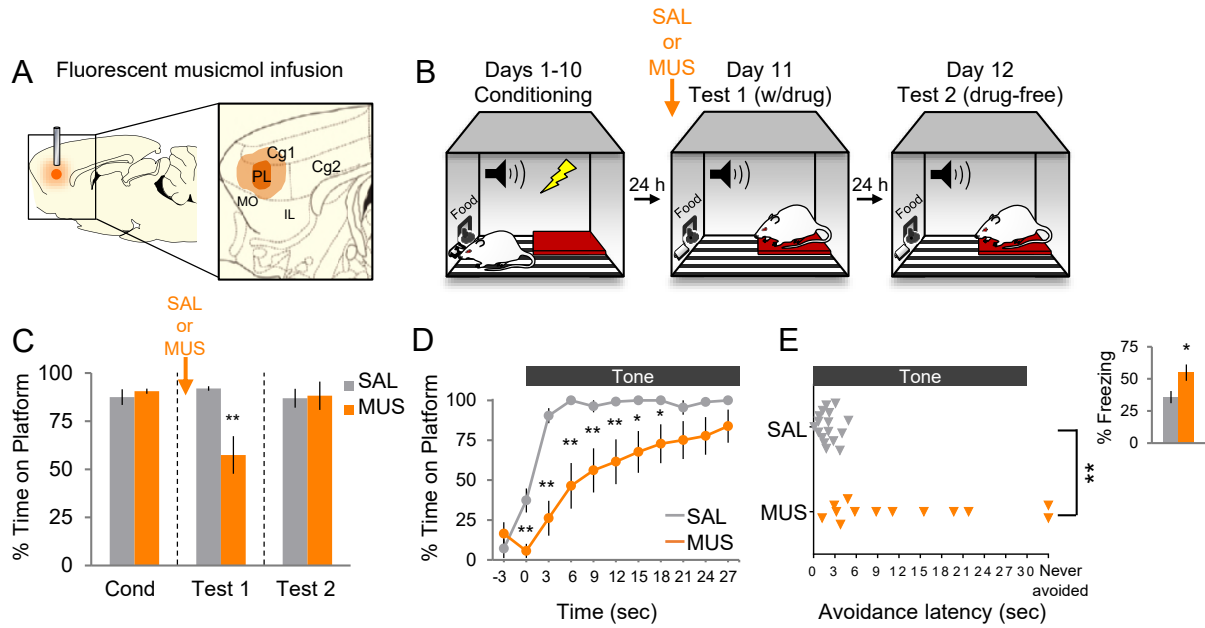

**Figure 1. Pharmacological inactivation of prelimbic cortex delays avoidance.** **A.** Schematic of MUS infusion showing min (dark orange) and max (light orange) extent of infusion in PL. **B.** Rats were trained across 10 days to avoid a tone-signaled foot-shock by stepping onto a platform. On Day 11, rats received 2 tone presentations (without shock) 45 min after MUS infusion. On Day 12, rats received a second 2-tone test drug free. **C.** Percent time on platform during Tone 1 on Days 10, 11 (with MUS), and 12 for saline controls (SAL, n=17; grey) and MUS rats (n=13, orange). **D.** Time spent on platform in 3 sec bins (Tone 1, Test 1) revealed that MUS rats were significantly delayed in their avoidance compared to SAL controls (repeated measures ANOVA, post hoc Tukey). **E.** Latency of avoidance for each rat (Mann Whitney U test, Tone 1, Test 1). *Inset:* Effect of MUS inactivation (Tone 1, test 1) on freezing during the tone (unpaired t-test). Data are shown as mean  $\pm$  SEM; \*p<0.05, \*\*p<0.01.



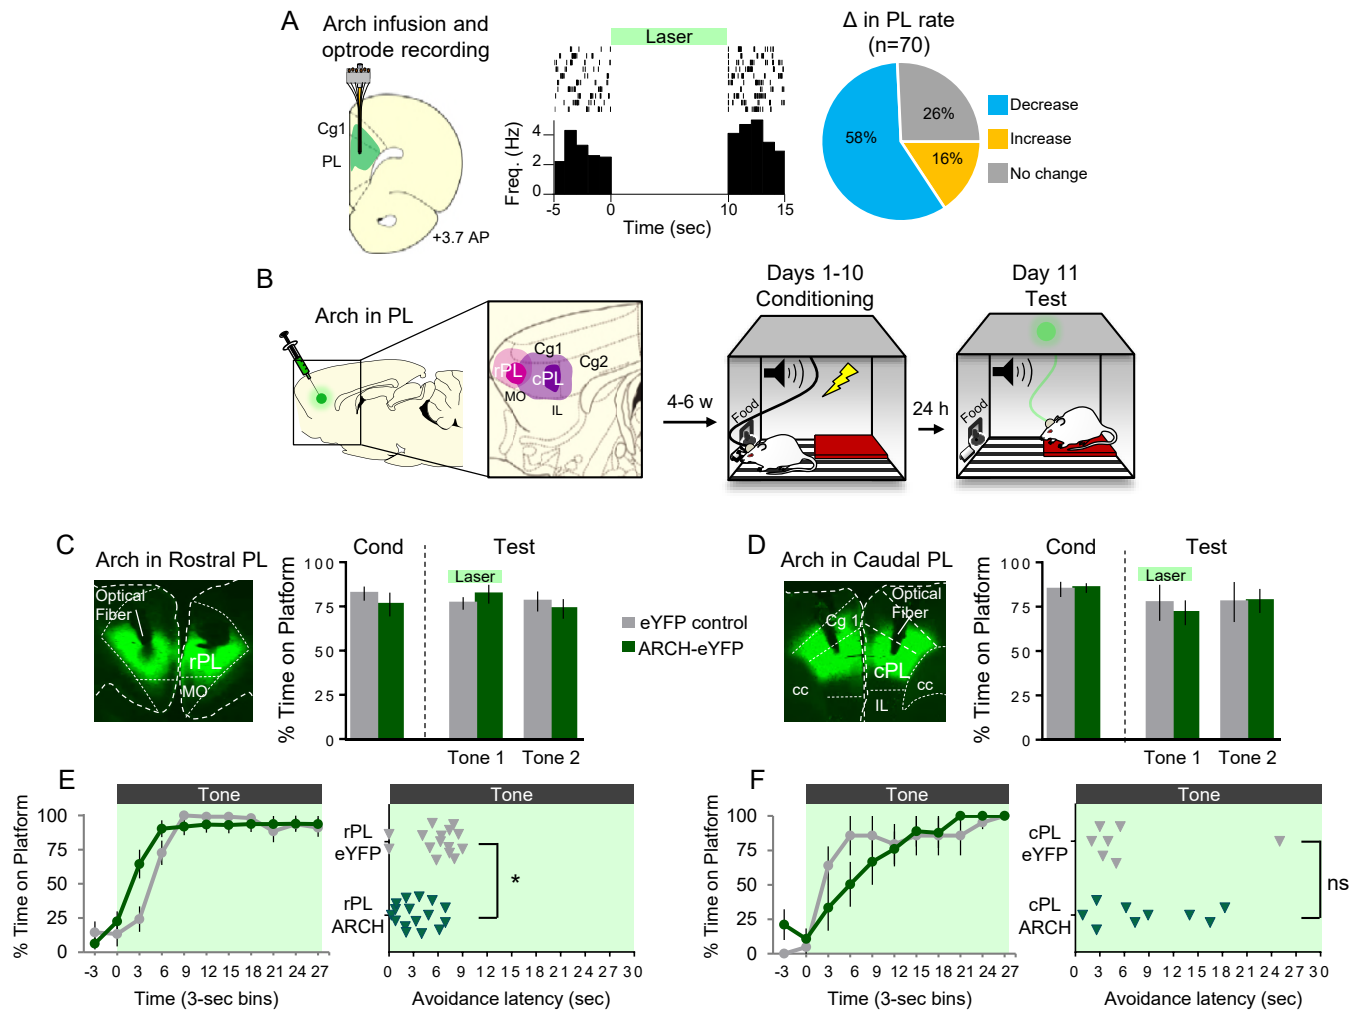

**Figure 2. Optogenetic silencing of prelimbic neurons does not delay avoidance.** **A. Left:** Schematic of Arch expression and optrode placement (n=2 rats). **Middle:** Rasters and peristimulus time histogram of a single PL neuron showing a decrease in firing rate during laser illumination (8-10mW, 532nm, 10s ON, 10s OFF, 10 trials). **Right:** Proportion of PL neurons that exhibited a decrease (blue, n=41), increase (gold, n=11), or no change (grey, n=18) in firing rate. **B.** Schematic of virus infusion, location of min/max expression of AAV in rPL (pink) and cPL (purple), followed by avoidance training and test. At Test, 532nm light was delivered to rPL or cPL during the entire 30-second tone presentation (Tone 1). **C. Left:** Micrograph of Arch expression and optical fiber placement in rPL. **Right:** Percent time on platform at Cond (Day 10, Tone 1) and Test (Day 11, Tone 1 with laser ON and Tone 2 with laser OFF) for eYFP-rPL control (n=15, grey) and Arch-rPL rats (n=17, green). **D. Left:** Micrograph of Arch expression and optical fiber placement in cPL. **Right:** Percent time on platform during Cond and Test for eYFP-cPL control (n=7, grey) and Arch-cPL rats (n=9, green). **E. Left:** Time spent on platform in 3 sec bins (Tone 1 at Test) revealed no effect of silencing rPL-Arch neurons compared to eYFP controls (repeated measures ANOVA, post hoc tukey). **Right:** Latency of avoidance for each rat (Tone 1 at Test). rPL-Arch rats showed a decrease in avoidance latency (Mann Whitney U test, p<0.05). **F. Timeline of avoidance (left) and latency (right) for cPL-eYFP control rats and cPL-Arch rats.** All data are shown as mean ± SEM; p<0.05.

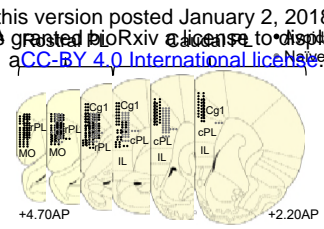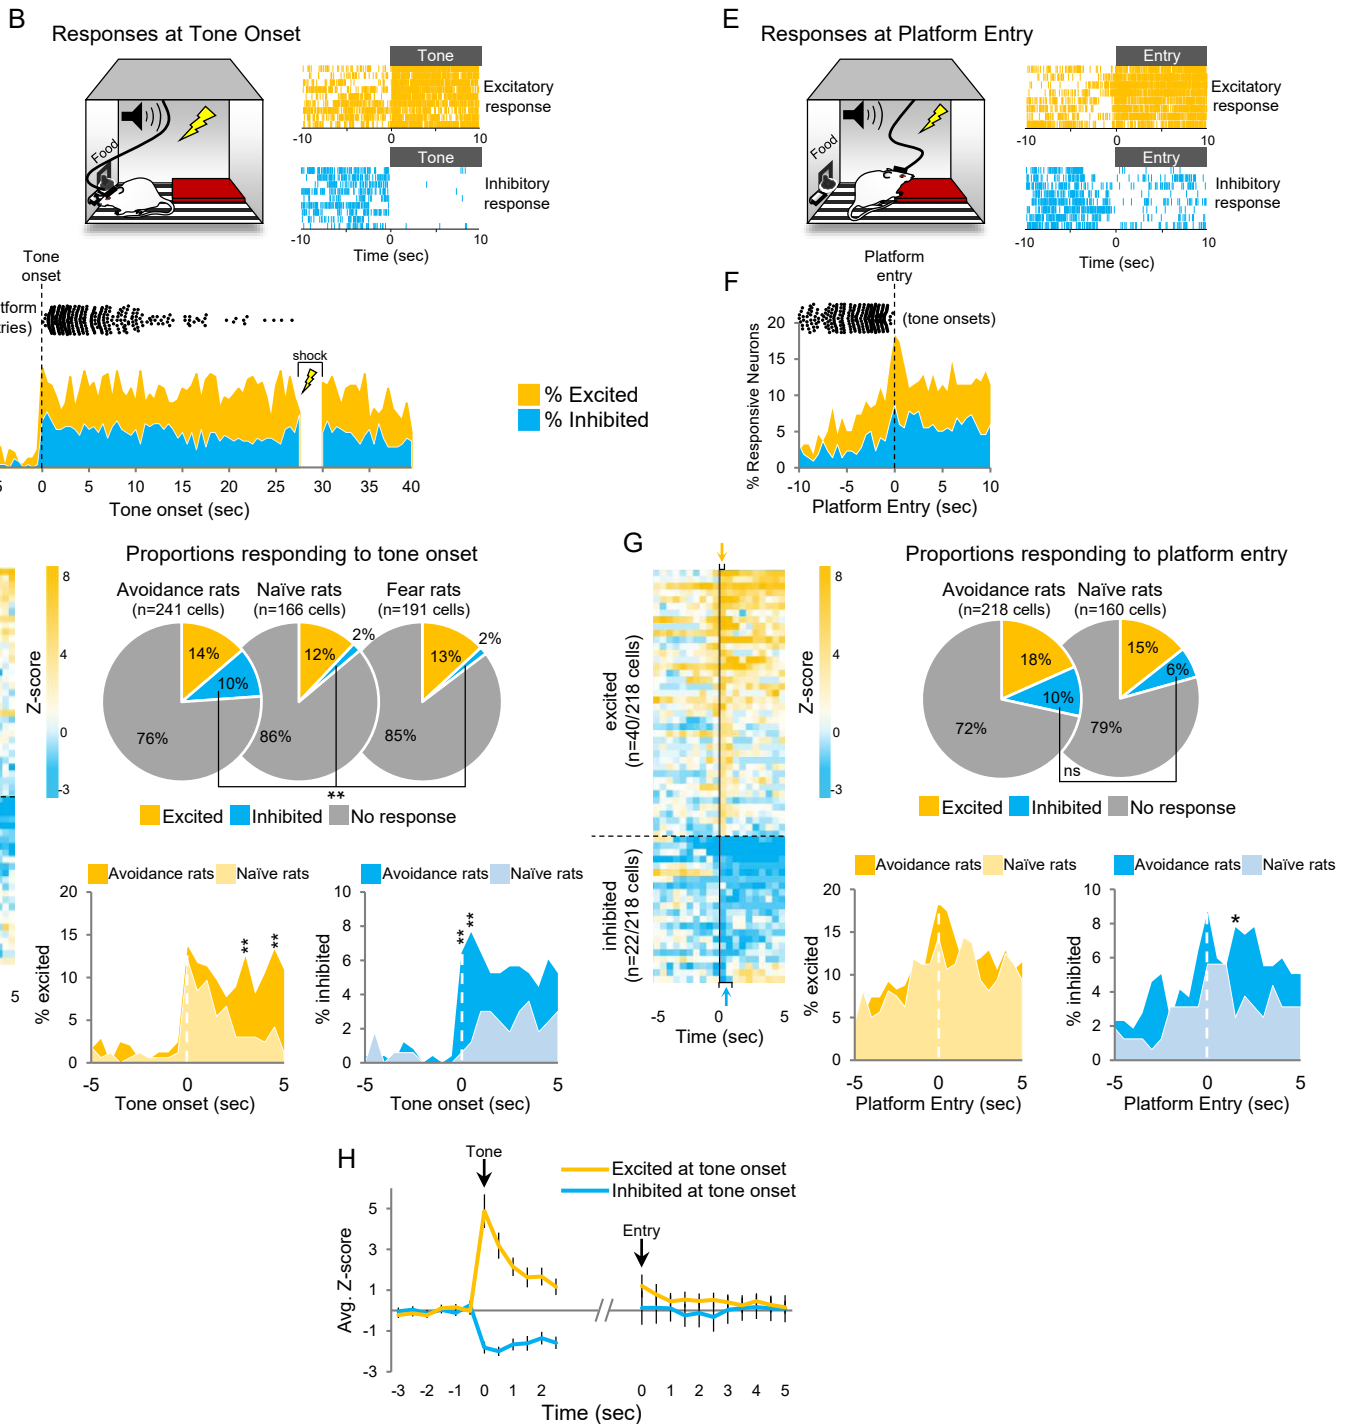

**Figure 3. Initiation of avoidance is correlated with inhibition in rostral PL neurons.** **A.** Location of recordings across PL (n=7 avoidance-trained and n=8 naïve rats). **B. Left:** Cartoon of rat behavior at tone onset during unit recordings. **Right:** single unit examples of an excitatory (gold rasters) and inhibitory tone response (blue rasters). Each row represents a single trial. **C.** Percentage of neurons that were excitatory (gold) or inhibitory (blue) throughout the tone. Time of platform entry (black dots), for all successful trials (n=340) in avoidance rats is indicated relative to tone onset. **D. Left:** Heat map of normalized responses (z-score) to tone onset (Time = 0 sec) of neurons in avoidance rats. Each row represents one neuron, bin = 0.5 sec. Arrows indicate bins used to determine criteria for excitatory (gold, first 500ms bin), or inhibitory (blue, first or second 500ms bin) tone responses. **Right:** Pie charts showing proportions of neurons that were excited, inhibited, or non-responsive at tone onset in avoidance (n = 34, 25, 182, respectively), naïve (n = 20, 3, 143, respectively), and fear conditioned rats (n = 25, 3, 163, respectively). Proportion of inhibitory responses were significantly greater in avoidance rats compared to naïve and fear rats (Chi Square test, \*\*p<0.001). **Bottom:** Percentage of cells that were excited in avoidance (gold) or naïve (light gold) rats (left) or inhibited in avoidance (blue) or naïve (light blue) rats (right) around tone onset (Fisher exact tests). **E. Left:** Cartoon of rat entering platform after tone onset during unit recordings. **Right:** single unit examples of an excitatory (gold rasters) and inhibitory platform entry response (blue rasters). **F.** Percentage of neurons that were excitatory (gold) or inhibitory (blue) at platform entry. Time of tone onset (black dots), for all successful trials (n=340) in avoidance rats is indicated relative to platform entry. **G. Left:** Heat map of normalized responses to platform entry (Time = 0 sec) of neurons in avoidance rats. **Right:** Pie charts showing proportions of neurons that were excited, inhibited, or non-responsive at platform entry in avoidance (n = 40, 22, 156, respectively) and naïve rats (n = 23, 10, 127, respectively). **Bottom:** Percentage of cells that were excited in avoidance (gold) or naïve (light gold) rats (left) or inhibited in avoidance (blue) or naïve (light blue) rats (right) after platform entry (Fisher exact tests). **H.** Tone responsive neurons were not responsive to platform entry. All data are shown as mean ± SEM; \*p<0.05, \*\*p<0.01.

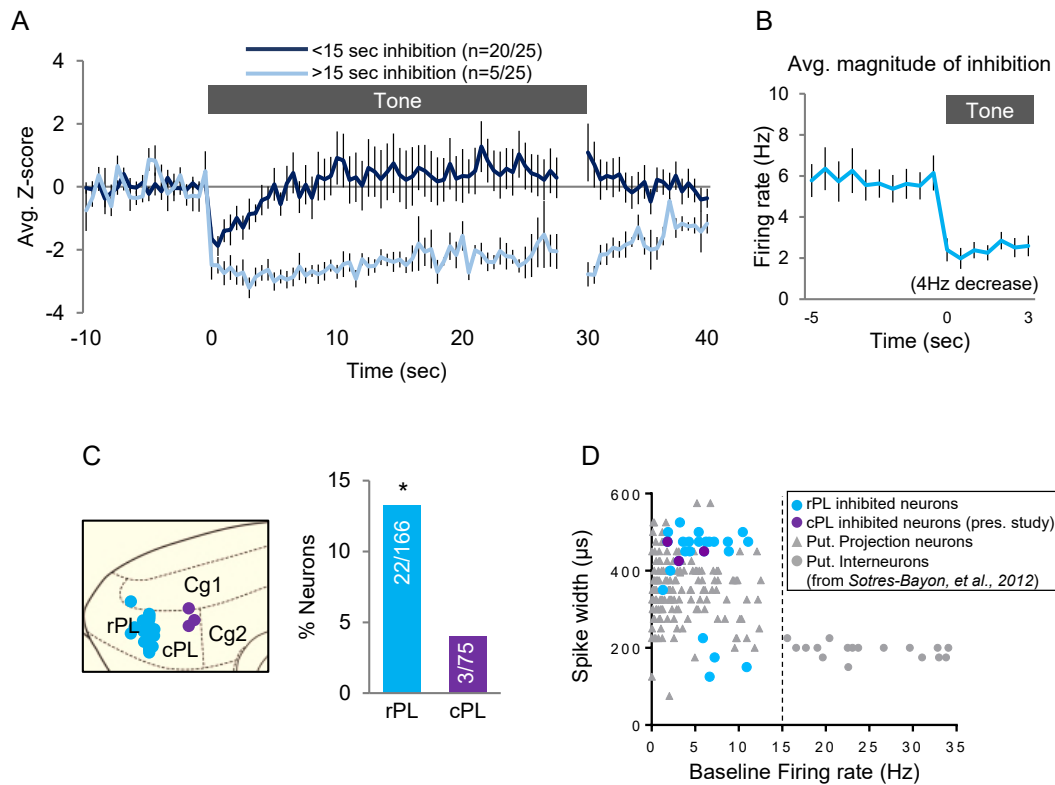

**Figure 4. Characterization of inhibitory tone responsive neurons.** **A.** Normalized firing rate of cells that were inhibited for less than 15 sec (dark blue) or more than 15 sec (light blue) after tone onset. **B.** Average inhibitory response of neurons decreased from a baseline firing rate of 5.8 Hz to 1.98 Hz at tone onset. **C. Left:** sagittal view of location of inhibitory tone responsive neurons in rPL (blue) or cPL (purple). **Right:** Histogram analysis revealed that more inhibited neurons were located in rPL (Fisher Exact Test). **D.** Classification of PL neurons into putative projection neurons (gray triangle) or interneurons (gray circle) based on spike width and baseline firing rate (Sotres-Bayon et al, 2012). Neurons showing inhibitory responses (blue/purple, n=25) were likely projection neurons. All data are shown as mean  $\pm$  SEM; \*p<0.05.

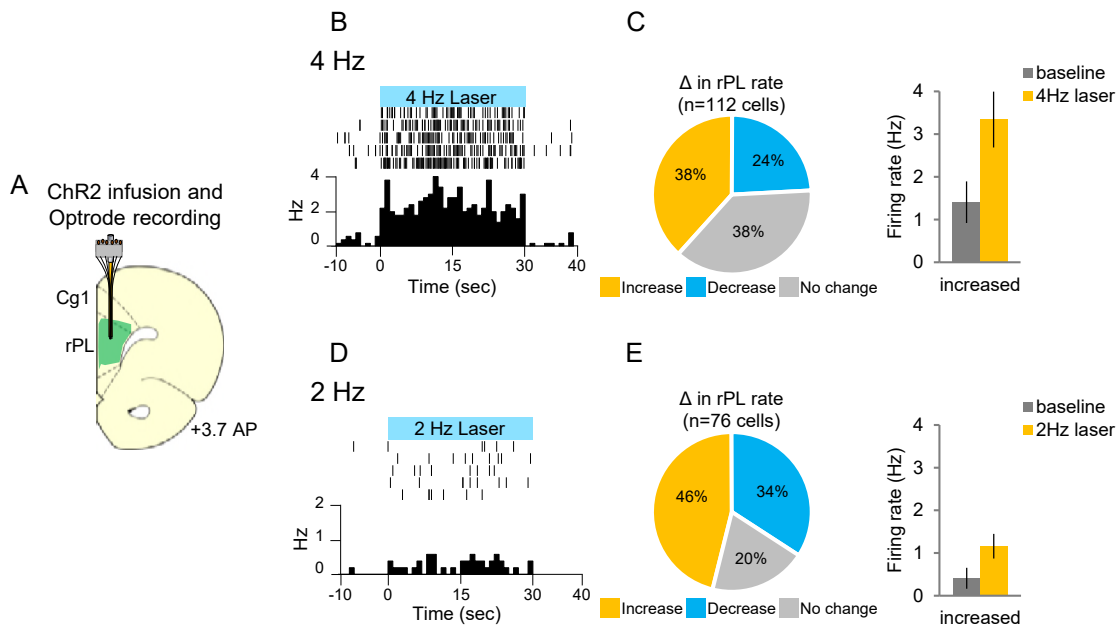

**Figure 5. 4 Hz photoactivation and single unit recordings of rostral PL neurons in anesthetized rats.** **A.** Schematic of ChR2 expression and optrode placement (n=4 rats). **B.** Rasters and peristimulus time histograms of a representative single neuron showing increased firing rate during laser illumination (8-10mW, 473nm, 30s ON, 30s OFF, 4 Hz, 5 trials). **C. Left:** Proportion of neurons showing an increase (gold, n=43), decrease (blue, n=27), or no change (grey, n=42) in firing rate with laser ON. **Right:** Average firing rate at baseline (dark grey) and 4 Hz photoactivation for neurons showing increased (gold) changes in firing rate. **D.** Rasters and peristimulus time histograms of a representative single neuron showing increased firing rate during laser illumination (8-10mW, 473nm, 30s ON, 30s OFF, 2 Hz, 5 trials). **E. Left:** Proportion of neurons showing an increase (n=35), decrease (n=26), or no change (n=15) in firing rate with laser ON. **Right:** Average firing rate at baseline, and 2 Hz photoactivation for neurons showing increased changes in firing rate. All data are shown as mean  $\pm$  SEM.

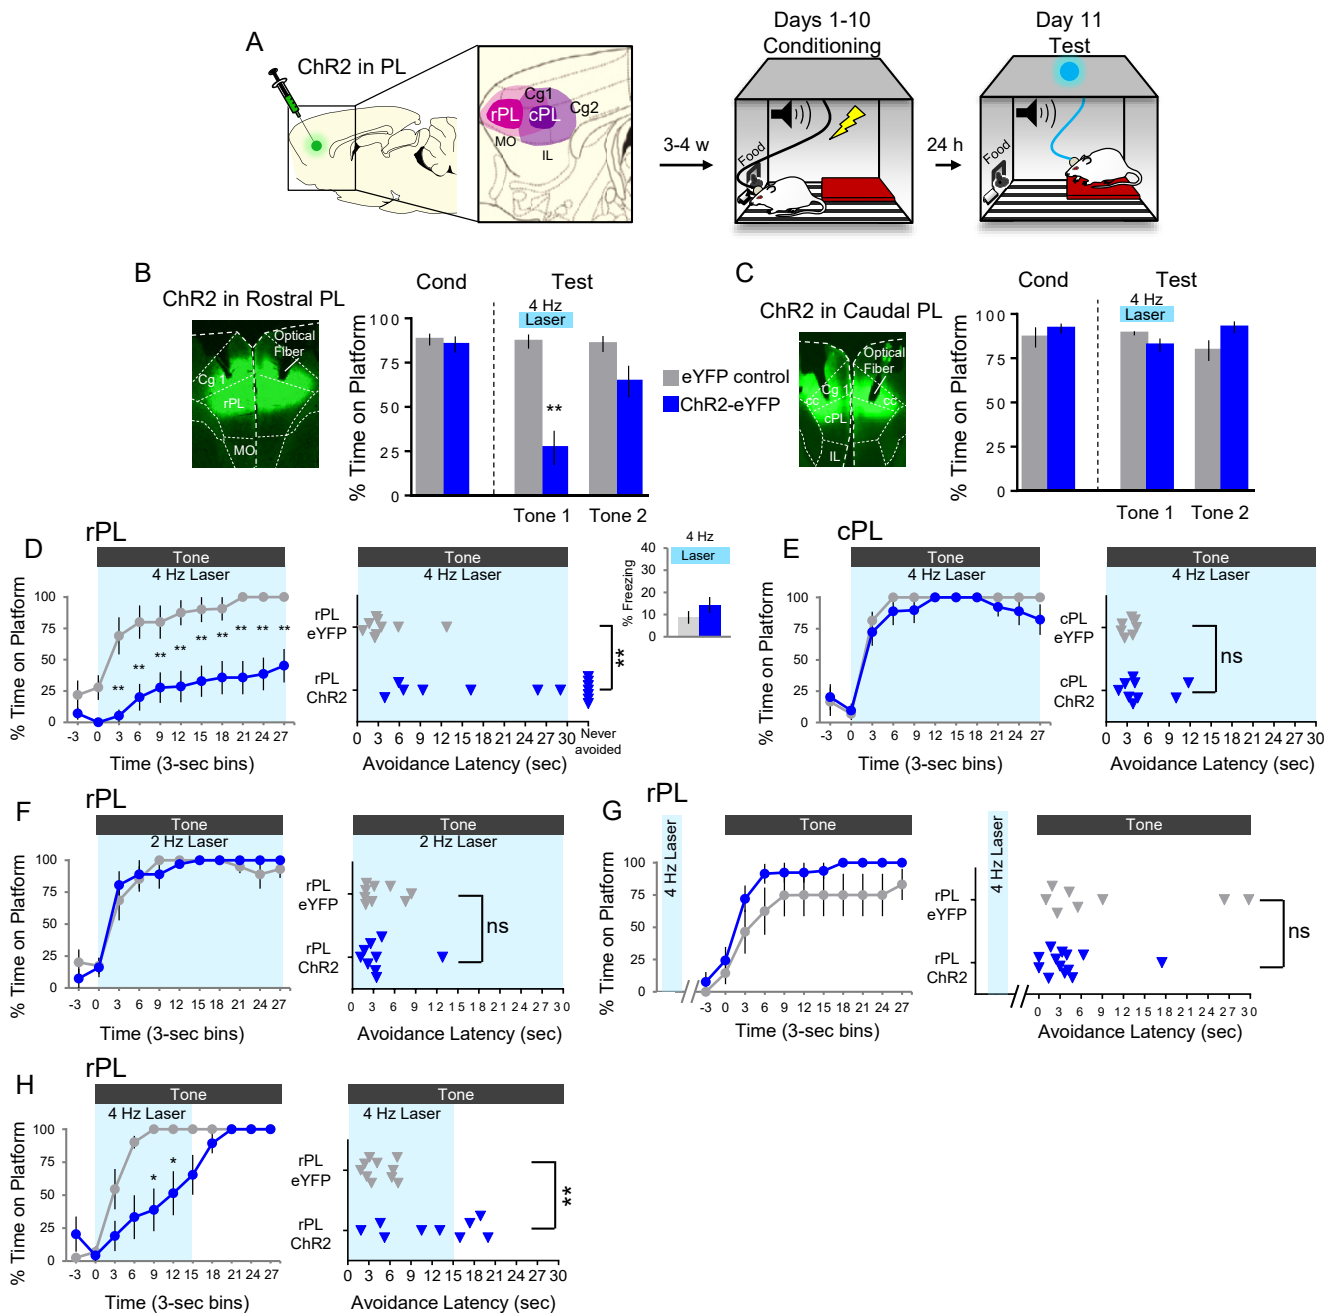

**Figure 6. 4 Hz photoactivation of rostral PL neurons during the tone delays or prevents avoidance.** **A.** Schematic of viral infusion and location of min/max spread of AAV expression in rPL (pink) and cPL (purple), followed by avoidance training and test. At Test, 473nm light was delivered to rPL or cPL during the first 30-second tone presentation (Tone 1). **B. Left:** Micrograph of ChR2 expression and optical fiber placement in rPL. **Right:** Percent time on platform at Cond (Day 10, Tone 1) and Test (Day 11, Tone 1 with laser ON and Tone 2 with laser OFF) for eYFP-rPL control rats (grey, n=9) and ChR2-rPL rats (blue, n=14). **C. Left:** Micrograph of ChR2 expression and optical fiber placement in cPL. **Right:** Percent time on platform during Cond and Test for eYFP-cPL control rats (grey, n=7) and ChR2-cPL rats (blue, n=9). **D. Left:** Time spent on platform in 3 sec bins (Tone 1 at Test) revealed that rPL-ChR2 rats were significantly delayed in their avoidance compared to eYFP controls (repeated measures ANOVA, post hoc tukey). **Right:** Latency of avoidance for each rat (Mann Whitney U test, Tone 1 at Test). 7/14 rats never avoided. **Inset:** 4 Hz photoactivation in rPL had no effect on freezing (Tone 1 at Test). **E.** Timeline of avoidance (left) and latency (right) for eYFP-cPL control ChR2-cPL rats revealed no effect of 4 Hz photoactivation of cPL. **F.** Timeline of avoidance (left) and latency (right) for eYFP-rPL control rats (grey, n=9) and ChR2-rPL rats (blue, n=9) revealed no effect of 2 Hz photoactivation. **G.** Timeline of avoidance (left) and latency (right) for eYFP-rPL control rats (grey, n=8) and ChR2-rPL rats (blue, n=13) revealed no effect of 4Hz photoactivation during a 30 sec ITI period. **H.** Timeline of avoidance (left) and latency (right) for eYFP-rPL control rats (grey, n=10) and ChR2-rPL rats (blue, n=9) revealed a delay in the initiation of avoidance with 4Hz photoactivation during the first 15 sec of the tone (Mann Whitney U test for time course and avoidance latency). All data are shown as mean  $\pm$  SEM; \*p<0.05; \*\*p<0.01.
